# Muller's Ratchet and the Long-Term Fate of Chromosomal Inversions

Emma L. Berdan<sup>1\*#</sup>, Alexandre Blanckaert<sup>2\*#</sup>, Roger K. Butlin<sup>1,3</sup>, and Claudia Bank<sup>2</sup>

<sup>1</sup>Department of Marine Sciences, University of Gothenburg, Göteborg, Sweden

<sup>2</sup>Instituto Gulbenkian de Ciência, Oeiras, Portugal

<sup>3</sup>Department of Animal and Plant Sciences, University of Sheffield, Sheffield, UK

\*- These authors contributed equally to this work.

# - Corresponding authors: [emma.berdan@gmail.com](mailto:emma.berdan@gmail.com), [blanckaert.a@gmail.com](mailto:blanckaert.a@gmail.com)

**Keywords:** chromosomal inversion, Muller's Ratchet, associative overdominance, genic selection, non-adaptive divergence, balancing selection

## Abstract

Chromosomal inversions contribute widely to adaptation and speciation, yet they present a unique evolutionary puzzle as both their allelic content and frequency evolve in a feedback loop. In this simulation study, we quantified the role of the allelic content in determining the long-term fate of the inversion. Recessive deleterious mutations accumulated rapidly on both arrangements with most of them being private to a given arrangement. The emerging overdominance led to maintenance of the inversion polymorphism and strong non-adaptive divergence between arrangements. The accumulation of mutations was mitigated by gene conversion but nevertheless led to the fitness decline of at least one homokaryotype. Surprisingly, this fitness degradation could be permanently halted by the branching of an arrangement into multiple highly divergent haplotypes. Our results highlight the dynamic features of inversions by showing how the non-adaptive evolution of allelic content can play a major role in the fate of the inversion.

## Introduction

Chromosomal inversions are large-scale structural mutations that may encompass millions of nucleotides but segregate together as a single unit due to repressed recombination. A surge of interest in inversions over the last 20 years has shown that inversions occur in a wide variety of taxa<sup>1, 2, 3</sup>, are often found to have facilitated evolutionary processes such as adaptation and speciation<sup>3, 4, 5, 6, 7</sup>, and are frequently under balancing selection<sup>7</sup>. However, we lack a solid understanding of how inversions themselves evolve and what factors determine their fate. Critically, inversions are dynamic and behave in qualitatively different ways from single-nucleotide polymorphisms (SNPs), since both their allelic content and their frequency can change over time. This concept has not been incorporated well in current evolutionary theory<sup>8</sup>, which reduces our ability to explain and predict the evolution of inversions in natural populations (but see ref.<sup>9, 10, 11</sup>).

A key feature governing the evolution of inversions is the reduction in effective recombination between the standard (S) and inverted (I) arrangements. Recombination proceeds normally in both homokaryotypes (II and SS). However, in heterokaryotypes (IS), single crossovers can lead to unbalanced chromosomes and therefore inviable gametes (but see ref.<sup>12</sup> for other mechanisms of recombination repression<sup>12</sup>). Thus, only gene conversion and double crossovers contribute to gene flux (i.e. genetic exchange between arrangements<sup>13</sup>), although recent studies have demonstrated that gene conversion occurs at normal or higher rates in inverted regions<sup>14, 15</sup>. This partial repression of recombination means that the arrangements behave like independent populations that exchange migrants. Thus, the arrangements essentially suffer a reduced population size when compared to the rest of genome; within each arrangement, selection is less effective and genetic drift more prevalent. This pseudo population-substructure affects both standing genetic variation and the fate of new mutations. The magnitude of this effect is governed by the frequencies of the different karyotypes (II, IS, and SS). In turn, the allelic content of the inverted and standard arrangements determines their marginal fitness and therefore the frequencies of the different

karyotypes. This creates a dynamic feedback loop between the frequency and the allelic content of the arrangements, which has to date received little attention in the literature.

Here we close this gap by modelling how the allelic content of an inversion evolves during its lifetime and significantly impacts its long-term fate. Using Slim v2.6<sup>16</sup>, a forward simulation program, we quantify changes in the allelic content of the inverted region over time and elucidate the role of gene conversion in preventing the accumulation of recessive deleterious mutations. We find that the minority arrangement, which experiences the stronger decrease in population size, accumulates mutations rapidly, leading to a swift decline in the fitness of the corresponding homokaryotype. In smaller populations, this process also occurs in the majority arrangement, resulting in a balanced lethal system. We identify a mechanism that can stop the fitness degradation of homokaryotypes, which we term ‘haplotype clustering’. We discuss how our theoretical predictions can be validated empirically, and highlight the relevance of our results to other scenarios of low recombination.

## Results

We used computer simulations under biologically realistic parameter combinations (based on *Drosophila melanogaster* estimates<sup>17, 18, 19</sup>) to examine the joint evolution of the allelic content and frequency of an inversion. For a detailed description of the simulation we refer to the Methods. Briefly, we simulated the evolution of an isolated population while allowing for recessive deleterious mutations. Upon reaching mutation-selection balance, we selected a random haplotype, assumed that an inversion happened in this haplotype, and followed the short and long-term fate of the newly created inverted arrangement (replicated 100 times). We assumed that the inverted arrangement itself generates a minor selective advantage when heterozygous ( $s_{\text{HET}} = 0.03$ ), increasing its initial invasion probability without strongly affecting the long-term fitness differences between karyotypes. Overall recombination rate was defined as the sum of the rate of single crossovers (CO) and gene conversion (GC) and corresponds to the rate of initialization of a recombination event. This was constant over the entire genome and all of the karyotypes. However, the success of this initialization differed between genomic regions and karyotypes. We use the term effective recombination rate to describe the difference in realized recombination events between karyotypes, as crossovers were completely repressed in the inverted region in heterokaryotypes. Since double crossovers were not modeled, only GC contributed to gene flux in our model. We evaluated the effect of gene flux on inversion evolution by simulating the fate of a given inversion with and without GC while keeping the overall recombination rate constant.

### The Fate of the Inversion

Gene conversion had little to no effect on the short-term fate (Fig. 1a) of the inverted arrangement but increased the probability that the inversion was fixed or lost in the long-term (Fig. 1b). Without GC, the fate of the inversion (i.e. whether it was fixed, lost, or maintained as polymorphic over  $> 500,000$  generations) was decided within the initial  $\sim 60,000$  generations (Fig. 1f; no losses were observed after generation 58,620). At high GC rates, this was no longer true: even if the inverted arrangement successfully invaded, a risk of losing the

polymorphism through genetic drift remained (Fig. 1e). This occurs when the GC rate is high enough to partly compensate for the lack of crossing over in heterokaryotypes, which partially erases the pseudo population-substructure created by the inversion. Here, the mutational load of the majority arrangement, usually the standard, remains low through two processes. First, purifying selection remains effective in the majority arrangement due to its high frequency. Second, mutations spread between arrangements and thus neither contribute to fitness differences between the karyotypes nor impact the fate of the inversion. Under soft selection, i.e., when there are always enough offspring produced to reach carrying capacity, fitness is relative. Therefore, the fixation of deleterious mutations in the whole population does not count towards the mutational load. The resulting high fitness of the majority arrangement allows for its potential fixation through genetic drift, which can result in the loss of the inversion polymorphism.

Nei and colleagues postulated that an inverted arrangement should be able to spread in a population without additional selective advantage only if it captures a haplotype with low mutational load compared to the rest of the population<sup>20</sup>. This is because inversions originate in a single haplotype; therefore, any inversion homokaryotype (II) will be homozygous for any deleterious recessive mutations present in the original haplotype. Standard homokaryotypes (SS), do not suffer from their mutational load because they are homozygous for very few deleterious recessive mutations on average. Thus, only a few inversion homokaryotypes (II) have a fitness equal to or higher than the mean fitness of the standard homokaryotypes (SS) (Fig. S1). In agreement with Nei's analytical results, we only observed fixation of the inverted arrangement when the inversion occurred in a haplotype with a low mutational load (Fig. 1c). However, fixation of the inverted arrangement only occurred in the presence of gene conversion and at large enough population size ( $N=2,500$ ). This is because fixation is only possible if the fitness of the inverted homokaryotype remains similar to the fitness of the heterokaryotypes, requiring a low mutational load of the inverted arrangement.

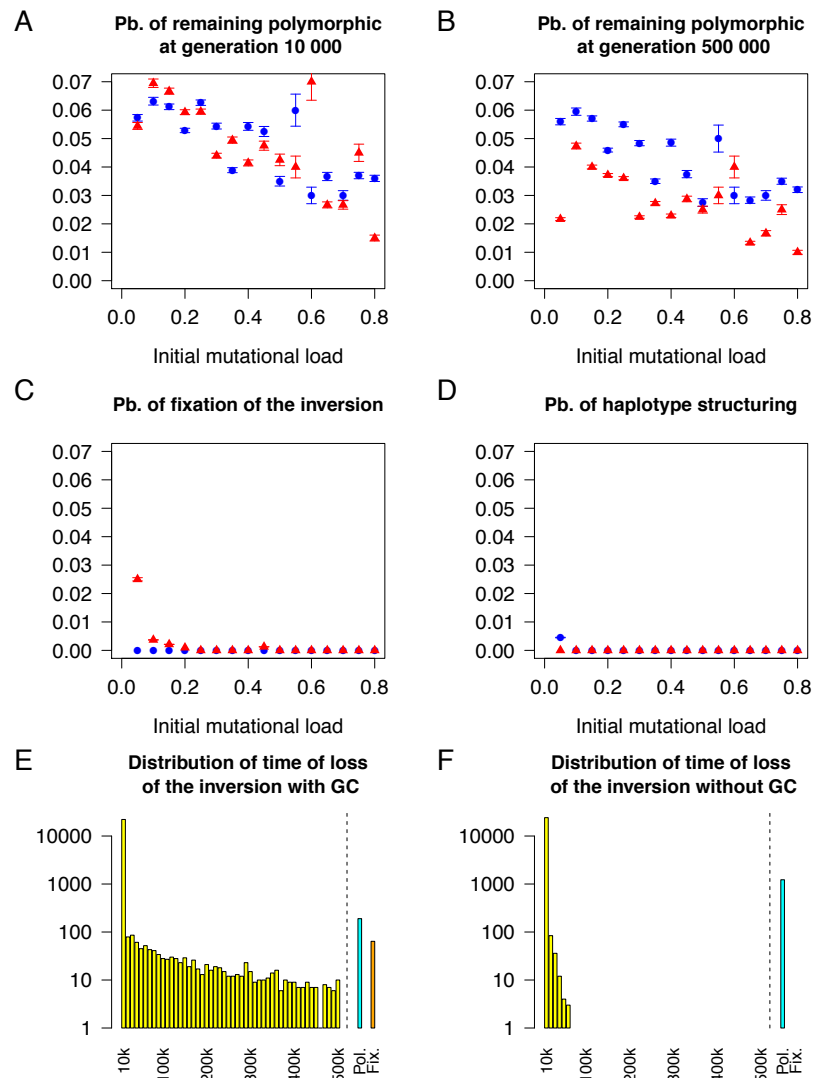

**Fig. 1.** Gene conversion increases the chance that an inversion is fixed or lost. (A) Probability of the inversion being polymorphic at generation 10,000 as a function of the mutational load in the presence (red) and absence of GC (blue). (B) Probability of the inversion remaining polymorphic at generation 500,000 as a function of the mutational load in the presence (red) and absence of GC (blue). (C) Probability of fixation of the inversion as a function of the mutational load in the presence (red) and absence of GC (blue). (D) Probability of haplotype structuring as a function of the mutational load in the presence (red) and absence of GC (blue). (E) Distribution of the time of loss of the inversion in the presence of GC. Simulations that remained polymorphic (blue) or fixed (red) are indicated specifically. (F) Distribution of the time of loss of the inversion in the absence of GC. Simulations that remained polymorphic (blue) or fixed (red) are indicated specifically.

## Muller's Ratchet Occurs Inside Chromosomal Inversions

Our results reveal that the content of both the inverted and standard arrangements can change dramatically through the accumulation of recessive deleterious mutations (Fig. 2). Generally, the fitness dropped more steeply in the inverted arrangement, but this pattern was reversed

when the inversion occurred in a high-fitness haplotype and the inverted arrangement became the majority arrangement. Importantly, whenever the inversion invaded, both arrangements suffered a decrease in both effective population size and effective recombination rate. This had two important consequences. First, most new mutations remained private to the arrangement they occurred in. Second, recessive deleterious mutations accumulated on the arrangements (Fig. 2b,d,f). Accordingly, each arrangement experienced a process similar to Muller's ratchet, which is the step-wise stochastic loss of haplotypes with the lowest mutational load<sup>21, 22, 23, 24</sup>. Despite the accumulation of deleterious mutations, the inversion remains in the population due to heterokaryotype advantage. This is sometimes referred to as associative overdominance which is caused by linkage disequilibrium between the inversion and alleles within it that confer heterozygote advantage. Both overdominant as well as recessive deleterious alleles may contribute to this phenomenon<sup>8, 25, 26</sup>. In our model, overdominance of the inversion is generated by genic selection where inversions act as neutral vehicles of the individual alleles, *sensu* Wasserman<sup>27, 28</sup>. Heterokaryotype advantage is caused by the masking of deleterious recessive mutations, as most mutations are private to their arrangement. Thus, Muller's ratchet provides the raw material upon which genic selection acts, leading to the maintenance of the inversion polymorphism.

The level of gene flux, determined solely by gene conversion in our model, is a key factor in determining the allelic content of the arrangements. At low GC rates, both the inverted and the standard arrangement accumulated deleterious mutations and experienced a corresponding decrease in fitness. In particular, the minority arrangement accumulated mutations at a much faster rate (Fig. 2a,c). The addition of gene conversion to the model slowed down the accumulation of deleterious mutations in both arrangements as expected (Fig. 2b,f). On average, both the majority and minority arrangement accumulated > 20x more mutations in the absence of GC (majority arrangement: 23x, 95% confidence interval (CI) from bootstrapping: 18.3-29.0; minority arrangement: 28x, 95% CI 15.3-53.4). However, high GC rates did not affect the fitness of the two arrangements equally, mutation accumulation was stopped in the majority arrangement. Thus, the fitness of the majority homokaryotype was scarcely affected by mutation accumulation (because a small decrease in population size means a slightly larger mutational load), whereas the fitness of the minority homokaryotype decreased to  $\sim 0$  ( $< 10^{-3}$ ). Non-zero GC rates allowed both mutations and ancestral alleles to "jump" between arrangements and fix in the whole population, which reduced divergence between arrangements (see below) and aided the purging of deleterious mutations. At low GC rates, the global fixation rate of mutations within the inverted region (i.e. mutations that spread across arrangements) was reduced (see turquoise line, Fig. 2b,d). However, at sufficiently high GC rates, mutations could spread across arrangements and fix in the whole population at a similar rate to the collinear genomic regions (see turquoise line, Fig. 2f). Thus, the mutational load of the individual arrangements remains lower, but ancestral alleles can be irreversibly lost from the whole population.

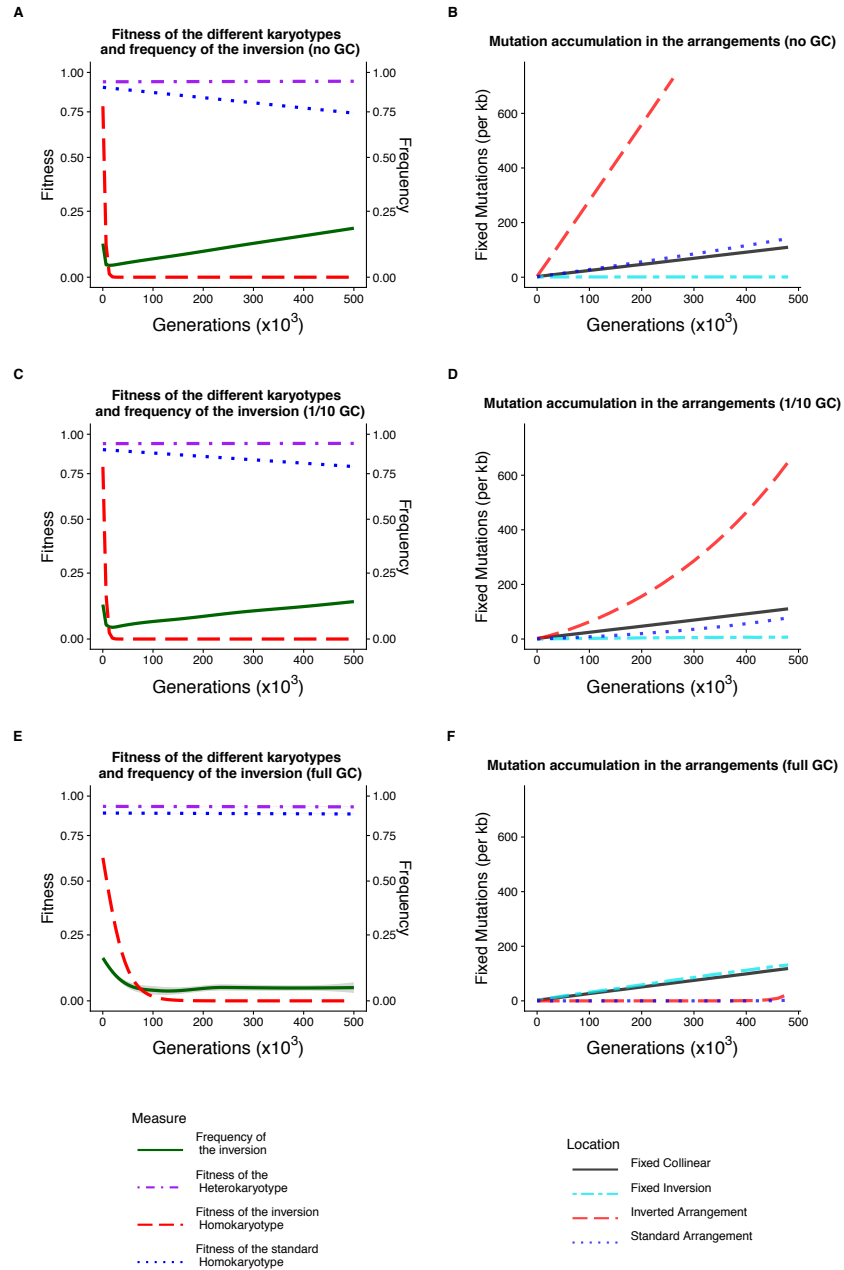

**Fig. 2.** Fitness decay of the homokaryotypes and accumulation of mutations in the different arrangements (A,C,E). Fitness of the different karyotypes for the inversion and frequency (green) of the inversion over 500,000 generations following the introduction of the inversion under (A) a scenario with no gene conversion, (C) a scenario with 1/10 of the *D. melanogaster* gene conversion rate, and (E) a scenario with the *D. melanogaster* gene conversion rate. (B,D,F) Corresponding cumulative distribution of fixed mutations per kb in the inverted arrangement (red), the standard arrangement (blue), the inverted region (turquoise), and in the collinear region (black) depending on the generation when the mutation appears. Results were obtained from 1,000 replicates where we only display successful maintenance of the inversion polymorphism (5 cases with a high rate of GC, 60 cases with 1/10 of the previously used GC rate GC, and 61 cases without GC).

The population size also has a strong impact on the long-term fate of the inversion. In larger populations, mutation accumulation was either stopped or bypassed (see Section *Appearance of Haplotype Structuring* below) and only the minority homokaryotype became inviable (defined here as having an average relative fitness  $< 0.001$ ). This was always the case at high GC rates and almost always in its absence (99.2%). In small populations, stronger genetic drift led to a new evolutionary outcome where both homokaryotypes became inviable. In this case only heterokaryotypes contributed to subsequent generations. This long-term outcome was observed both in the absence of GC (56/56 test cases in which the inversion polymorphism remained) and at high rates of gene conversion (10/15 test cases in which the inversion polymorphism remained). Thus, at small population sizes, an inversion polymorphism may trigger the development of a balanced lethal system, various cases of which have been observed in nature<sup>29, 30, 31, 32, 33, 34</sup>.

### **Mutation accumulation causes strong divergence between arrangements**

Whenever the inverted arrangement invaded, mutation accumulation within each arrangement resulted in fixed differences between the inverted and standard arrangement (Fig. 3a,b). Unsurprisingly, more fixed differences accumulated in the absence of gene conversion (average number of fixed mutations without GC:  $4,609 \pm 7$ ) than in its presence (average number of fixed mutations with GC:  $182 \pm 2$ ). This strong between-arrangement divergence was reflected in high overall  $F_{ST}$  values between arrangements within the inverted region, compared with little divergence across the rest of the chromosome (Fig. 3). Notably, no beneficial mutations are necessary for the buildup of the between-arrangement divergence. To better understand the role of purifying selection, we can separate the deleterious mutations into two categories: effectively neutral mutations (i.e.  $|s| < 1/(2N)$ ) and deleterious mutations. In our simulations (see Methods), about 5% of new deleterious mutations are effectively neutral. If purifying selection is a potent force, we expect a greater proportion of fixed mutations to be effectively neutral. We find that purifying selection in large populations was relatively effective in collinear regions as  $\sim 50\%$  of the fixed mutations were effectively neutral (Fig. S2). However, within the two arrangements, the effectiveness of purifying selection was strongly decreased, particularly in the minor arrangement. This is evidenced by the proportion of effectively neutral fixed mutations in simulations without GC (majority arrangement:  $46.1\% \pm 0.1\%$ ; minority arrangement:  $5.2\% \pm 0.03\%$ ). The addition of GC changed the number of fixed mutations within arrangements (see above) but barely affected the proportion of effectively neutral fixed mutations (majority arrangement:  $43.6\% \pm 0.9\%$ ; minority arrangement:  $5.4\% \pm 0.1\%$ ). Surprisingly, some fixed mutations were very strongly deleterious (Fig. S3). Both the strong within-arrangement divergence and the observation of less effective purifying selection support the interpretation of an inversion as a genomic region in which the population experiences a pseudo-substructure.



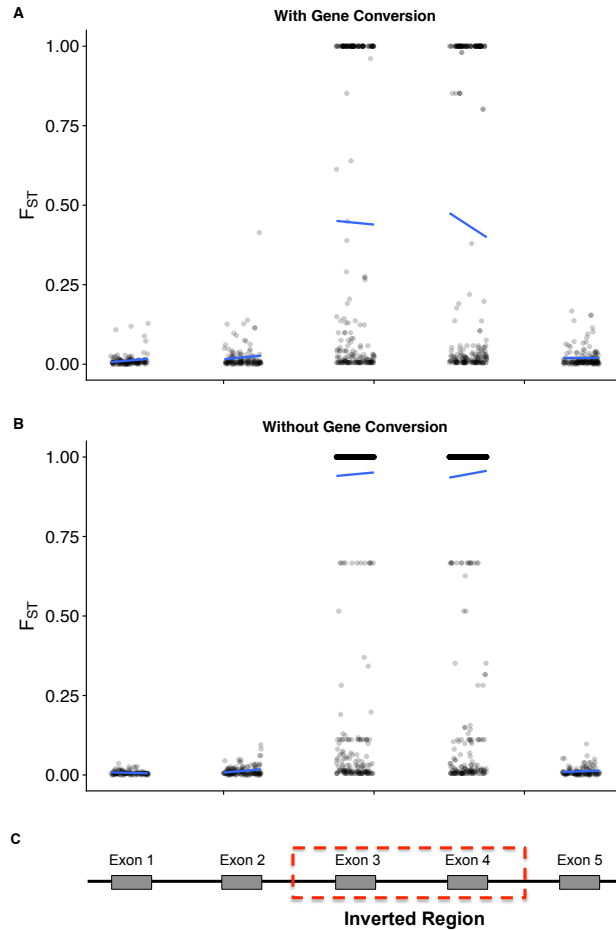

**Fig. 3.** Divergence between arrangements along chromosome 1. The blue lines indicate the smoothed conditional means. (A).  $F_{ST}$  with gene conversion, (B).  $F_{ST}$  without gene conversion, (C). Coding structure of chromosome 1, the red dashed lines indicate the inverted region.

### Appearance of haplotype structuring

The fitness degradation of one or both arrangements that we describe above was occasionally (10/1,228 runs without GC) halted by a mechanism we term *haplotype structuring*. When haplotype structuring occurred, the subpopulation composed of one arrangement split into two or more divergent haplotype clusters that carried partially complementary sets of deleterious recessive alleles (see Fig. 4 & 5). Homokaryotypes with two divergent haplotypes that each have a high mutational load are still relatively fit (e.g.  $I_jI_k$  and  $S_jS_k$ ) because deleterious mutations will be masked when divergent haplotypes are paired. Notably, this is equivalent to what is happening in heterokaryotypes (IS). Homokaryotypes with similar haplotypes (e.g.  $I_jI_j$  or  $S_jS_j$ ) tend to be inviable because the mutational load is no longer masked. This means that the fitness distribution of a given homokaryotype (e.g. II) has two modes; one corresponding to extremely unfit individuals and the other to relatively fit ones (see Fig. 5 for a schematic). Thus, a signature of haplotype structuring in a given arrangement is that the fitness of the corresponding homokaryotypes shifts from a unimodal to a bimodal distribution (Fig. S5).

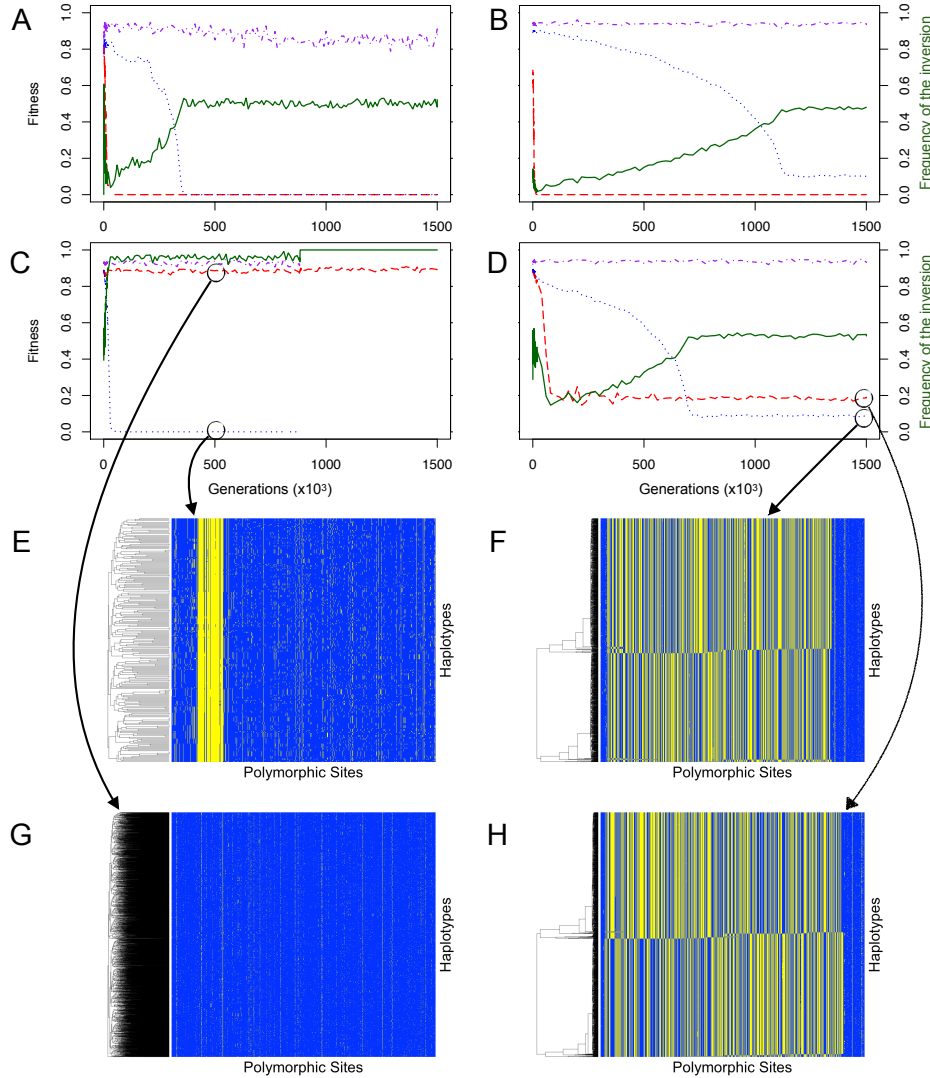

**Fig. 4.** Different evolutionary outcomes (A-D) and allelic content of the arrangements (E-H). (A-D) represent the fitness of the different karyotypes as well as the frequency of the inversion for all 4 outcomes. Fitness of the standard homokaryotype is given by the dotted blue line, of the inverted homokaryotype by the red dashed line and of the heterokaryotype by the dash-dotted purple line. The frequency of the inversion is given by the solid green line. (A) Balanced lethals, (B) inverted homokaryotype is inviable, standard homokaryotype remains viable through haplotype structuring: (C) inverted homokaryotype is viable, standard homokaryotype is inviable until the inversion fixes, (D) haplotype structuring in both the inverted and standard arrangements. (E-H) Allelic content of the inversion, each horizontal line represents a haplotype in the population and each vertical line represents a genomic locus. Yellow denotes that an individual possesses the derived allele and blue the ancestral one. The black circle indicates where the haplotypes were taken from. (E) Mutation accumulation in the minor arrangement, (F) haplotype structuring in the standard arrangement, (G) purifying selection in the majority arrangement, (H) haplotype structuring in the inverted arrangement.

Assuming that two divergent haplotypes exist within an arrangement:

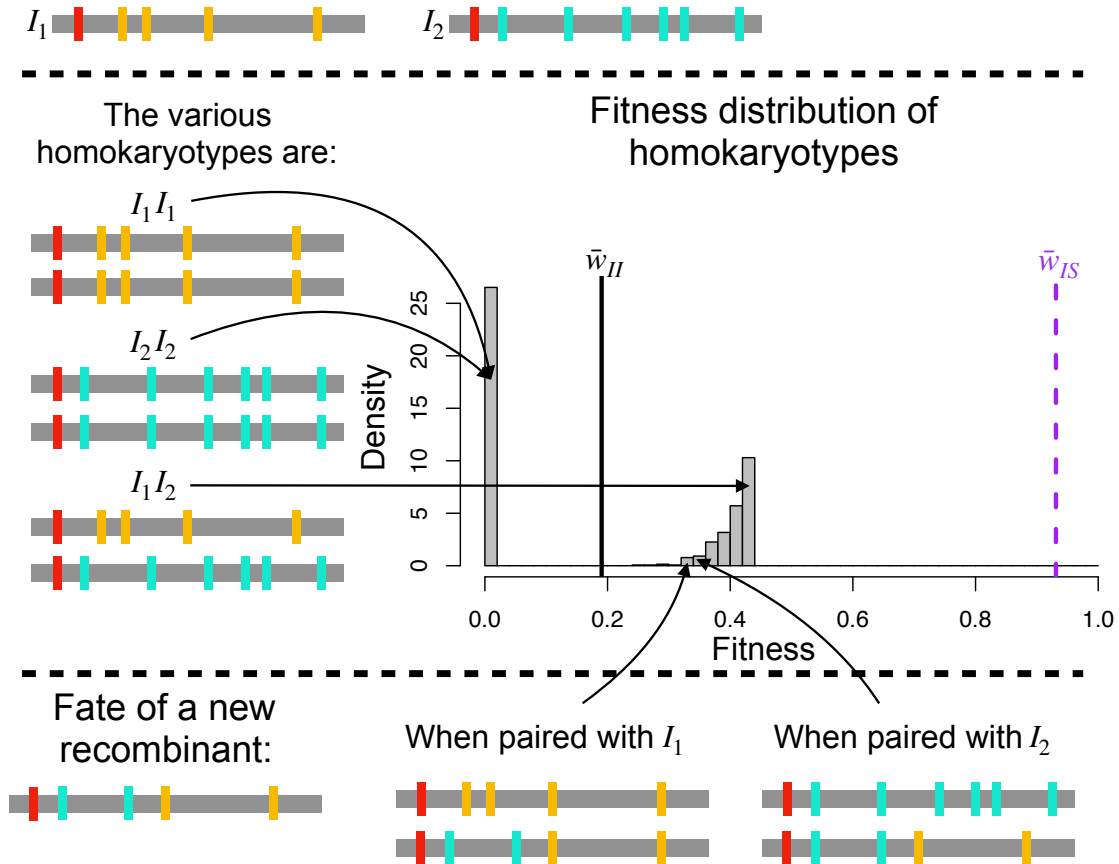

**Fig 5.** Schematic representation of the consequences of haplotype structuring on the fitness distribution of the homokaryotypes. Red, cyan, and mustard represent deleterious mutations. Homokaryotypic homozygotes have a fitness near 0 while homokaryotypic heterozygotes have a positive fitness, as only the mutations that are fixed in the arrangements (in red) are expressed, while the mutations unique to each haplotype (in mustard and cyan) are masked. This leads to the bimodal distribution of fitness illustrated here. For reference the vertical lines correspond to the mean fitness of heterokaryotypes (dashed purple) and homokaryotypes (black line). Haplotype structuring is stable against recombination as the new recombinant will express both mustard and cyan mutations, leading to a lower fitness, whenever it is associated with either of the two major haplotypes.

Haplotype structuring requires a significant level of within-arrangement diversity. Namely, the mutational load of the segregating haplotypes has to be high to create a large fitness difference between homokaryotype homozygotes (e.g.  $I_jI_j$  or  $S_jS_j$ ) and homokaryotype heterozygotes (e.g.  $I_jI_k$  or  $S_jS_k$ ), which in turn generates within-arrangement genic selection.

Therefore, haplotype structuring is not possible in small populations or at high GC rates. At high GC rates, the mutational load of the majority arrangement is not sufficiently high for haplotype structuring to occur and there are not enough copies of the minority arrangement present to create the necessary diversity. Similarly, in small populations, the haplotype diversity necessary for haplotype structuring cannot build up or be maintained because it is overwhelmed by the diversity-reducing force of genetic drift.

The divergent haplotype clusters that result from haplotype structuring are stable and are not disrupted by recombination. This is because recombination between divergent haplotypes creates new haplotypes that expose deleterious recessive mutations to selection when paired with either one of the parental haplotypes. Therefore, any recombinant haplotype is swiftly removed from the population even though its deleterious mutations are not exposed to selection in a heterokaryotype. Haplotype structuring has previously been described by Charlesworth and Charlesworth in a model of a diploid non-recombining population with deleterious recessive mutations<sup>35</sup>. To confirm this similarity, we triggered haplotype structuring in simulations of whole genomes with greatly reduced recombination rates. Haplotype structuring was possible across the full range of GC rates we tested as long as crossing-over rates were low (20% or less of our default value, Fig. S4). Thus, similar to how heterokaryotype advantage maintains an inversion polymorphism, heterozygote advantage at the level of the haplotype maintains the haplotype polymorphism (i.e. haplotype structuring). Importantly, although haplotype structuring halts the fitness decay of homokaryotypes, mutation accumulation continues, therefore the ratchet is not stopped.

## Discussion

Chromosomal inversions are dynamic variants that behave in qualitatively different ways from other polymorphisms (SNPs, indels). Specifically, both their allelic content and their frequency change over time, leading to two intertwined levels of evolution. We demonstrate here that the allelic content of an arrangement can degrade rapidly via a Muller's ratchet-like process. While the inversion remains polymorphic in the population, we observe an almost unhindered accumulation of deleterious recessive mutations in one or both of the arrangements until at least one of the homokaryotypes becomes inviable. In our simulations, this fitness decay is slowed by gene conversion but can only be stopped by haplotype structuring, the appearance of multiple highly-divergent haplotypes within an arrangement. Together, our results imply that inversions observed in nature are substantially different from the original invader even without the action of directional selection. Furthermore, we predict that they may harbor sub-haplotypes within arrangements that can distort population genetic statistics.

We show that a mutation accumulation process similar to Muller's ratchet happens within the arrangements, resulting in an excess of deleterious mutations within the inverted region compared to the rest of the genome. This heightened accumulation of deleterious mutations in polymorphic inversions compared to collinear regions has previously been noted in multiple empirical studies (mainly in *Drosophila*)<sup>9, 36, 37</sup>. Nonetheless, the rate of mutation accumulation differs between the standard and inverted arrangements. The extent of this difference depends on the relative frequency of the two homokaryotypes, as most "genome

shuffling” occurs in homokaryotypes. Gene conversion and double crossovers occur in heterokaryotypes but double crossovers are rare (approx.  $\rho^2$ , where  $\rho$  is the rate of single crossovers, ignoring crossover interference) and gene conversion only affects short lengths of DNA<sup>18</sup>. Thus, mutation accumulation is magnified in the minority arrangement as this subpopulation experiences both a stronger reduction in population size and a lower effective recombination rate (approx.  $r\rho^2$ , with  $r$  - the recombination rate and  $p$  - the frequency of the minority arrangement). Moreover, the minority arrangement experiences a less efficient purging of recessive deleterious mutations as they are only exposed to selection in few individuals. Eanes *et al.* developed a model showing that the minority arrangement accumulated more  $p$ -elements at lower frequencies and predictions from this model matched empirical data from *D. melanogaster*<sup>9</sup>. Other empirical studies have illustrated this relationship between arrangement frequency and mutational load<sup>37, 38, 39</sup>. Here, we go one step further by revealing the feedback loop between arrangement frequency and mutational load.

The accumulation of recessive deleterious mutations in the arrangements led to heterokaryotype advantage caused by the masking of recessive mutations. In the theoretical literature, the role of recessive deleterious mutations has been addressed previously, mainly regarding the invasion of an inverted arrangement<sup>20, 27</sup> but largely ignoring their role in the long-term maintenance of an inversion polymorphism. In nature, a contribution of deleterious recessive alleles to heterokaryotype advantage has been shown in seaweed flies<sup>40</sup> but empirical tests in other taxa remain scarce. As heterokaryotypes are often observed to be fitter than homokaryotypes<sup>41, 42, 43</sup>, mutation accumulation may commonly play a role in the maintenance of inversion polymorphisms.

In the age of next generation sequencing, the genomic landscape of many inversions is being dissected to elucidate the processes driving inversion evolution<sup>7, 44</sup>. Divergence observed between arrangements is often assumed to be adaptive and/or to predate the inversion itself whereas the process of deleterious mutation accumulation is largely ignored<sup>7, 12</sup>. However, as we show in Figure 3, it is possible that fixed mutations between different arrangements are neither adaptive nor predating the inversion. The strong divergence between arrangements that results from deleterious mutation accumulation can produce a similar population genetics signature to that of a cluster of (co-)adapted alleles within an arrangement<sup>45, 46, 47</sup>.

We were specifically interested in the long-term evolutionary fate of the inversion, when both arrangements were maintained in the population. We identified multiple stable evolutionary outcomes for each arrangement under deleterious recessive mutation accumulation (over 600N generations). They can be divided into three general categories, depending on the mutational load of the arrangement and the fitness of its corresponding homokaryotype.

First, if the mutation accumulation and the associated gradual decrease in homokaryotype fitness continued, then the corresponding homokaryotype eventually became inviable. This often occurred in only the minority arrangement. In this case the polymorphism was maintained but the minority arrangement only appeared in heterokaryotypes. When the corresponding homokaryotypes of both arrangements are inviable, only heterokaryotypes contribute to subsequent generations. Thus, the mutation accumulation process shown here is a credible model for the evolution of a balanced lethal system. Our results show that low

population size and reduced gene flux favor the evolution of such a system. Several empirical examples of balanced lethal systems associated with structural variants exist. These include multiple overlapping inversions in crested newts<sup>33</sup>, inversions in *Drosophila tropicalis*<sup>30</sup>, and translocations (similar to inversions, effective recombination in the translocated regions is also reduced) in multiple genera of plants such as *Isotoma*<sup>31</sup>, *Oenothera*<sup>29</sup>, *Rhoeo*<sup>32</sup>, and *Gayophytum*<sup>34</sup>. To provide evidence for the evolution of these balanced lethal systems through mutation accumulation in structural variants, inference of the demographic history of these populations will be essential in the future.

The second outcome is the maintenance of a highly fit homokaryotype, due to the low mutational load of the arrangement. This was observed only in the majority arrangement at high GC rates, where the mutation accumulation process was halted. Note that here the ratchet is truly stopped as opposed to haplotype structuring where the consequences of the ratchet are bypassed. The maintenance of the majority homokaryotype fitness is associated with the fitness of the minority homokaryotypes dropping to 0. When this occurs, the minority arrangement remains at very low frequency ( $s_{\text{HET}} / (1 + 2s_{\text{HET}})$ ) if the fitness differences are only due to the imposed initial heterozygote advantage). Thus, this outcome is the least stable as the high frequency of the majority arrangement combined with low fitness difference between heterokaryotypes and majority homokaryotypes facilitates fixation of the majority arrangement.

The third category of long-term stable outcomes involves haplotype structuring in an arrangement. Haplotype structuring halts the fitness decay of the corresponding homokaryotype but it does not stop the mutation accumulation process. As illustrated in Figure 5, the existence of two (or more) divergent haplotype clusters within an arrangement implies that most mutations will be masked in homokaryotype heterozygotes (e.g.  $I_j I_k$  or  $S_j S_k$ ). Similarly to what happens between arrangements, mutations tend to be private to haplotype clusters. Therefore, a subset of homokaryotypes still contributes to the next generation. The fitness consequences of the ratchet are merely bypassed due to the recessivity of the deleterious mutations.

The occurrence of haplotype structuring is not unique to inversions. It can also occur in diploid low-recombination systems with segregation of chromosomes. Thus, it may be a more widespread process in nature. We could reproduce haplotype structuring using simulations with similar conditions but without assuming an inversion, provided there was a strong decrease in crossing-over rate (Fig. S4). Haplotype structuring has been described previously<sup>35</sup>, where the authors modeled the accumulation of deleterious recessive mutations in a diploid, non-recombining, random-mating, sexual population and noted that the population could become crystallized into two divergent haplotypes. Although we recovered the crystallization part of the process, we sometimes observed more than two haplotype clusters (Fig. S6). In this case, fitness could be multimodal (Fig. S6b) depending on the fitnesses of the different homokaryotype heterozygotes. A larger number of divergent haplotypes increases the average fitness of homokaryotypic individuals because homozygotes (e.g.:  $I_j I_j$   $S_j S_j$ ) are inviable and their proportion (given by:  $\sum_{j=1}^n p_j^2$ , i.e. the sum of all possible homokaryotype homozygotes) decreases as the number of haplotype clusters increases. Therefore, the number of haplotype clusters obtained is the result of a balance between genic

selection, which selects for many haplotype clusters, and genetic drift, which reduces the number of haplotype clusters. Once clusters are formed, new recombinant haplotypes are counterselected due to the high number of shared recessive deleterious mutations between a recombinant and a resident haplotype (Fig. 5).

Whereas various examples of balanced lethals are known (discussed above), we are not aware of existing empirical evidence for haplotype structuring. This could be for two reasons. First, compensatory evolution and/or selective sweeps of beneficial mutations within the arrangements could erase haplotype structuring. We are currently ignoring beneficial mutations; adding these to the model would lead to selective sweeps that should reduce the diversity within the population. Therefore the initial requirement of strongly divergent haplotypes would possibly not be met. Second, the pattern may have remained invisible to date due to the low density of markers available in the past as well as the current common practice of pooled sequencing, which does not reveal haplotypes. Additionally, other aspects of experimental design - for example breeding designs that allow the fitness of offspring of each mating pair to be measured - are necessary to detect the predicted bimodal fitness distribution. Future empirical work could investigate these patterns, testing explicitly for bimodal fitness distributions and for the existence of clusters of haplotypes within arrangements using individual re-sequencing data.

Our results show that inversions are dynamic variants whose allelic content can evolve and impact their evolutionary fate. We also show that non-adaptive processes in inversions can nevertheless generate “adaptive-like” signatures. These results stress that the evolution of the allelic content of the inversion should be included in future models and in interpretations of sequence variation in inversions. Our study suggests several particular evolutionary outcomes of inversion evolution, which are potentially also applicable to regions of low recombination. The advent of improved methods for genome assembly should make it possible to determine how often haplotype structuring and balanced lethals are occurring in nature.

## Methods

We modeled a population of diploid individuals at initial mutation-selection balance using Slim v2.6<sup>16</sup>. We considered a population of  $N=2,500$  (with a subset of simulations run at  $N=500$ ) diploid individuals. The genome consisted of three chromosomes of 100 kb, with 30 kb of exons where allelic content was simulated. The allelic content of the rest of the chromosome was not simulated to alleviate the computational load although recombination could occur anywhere (see Fig. 3c for a schematic of chromosome 1). Exons were modelled as 5 kb segments which were separated from each other by 10 kb.

We calibrated our parameters based on estimates from *Drosophila melanogaster* to make them biologically relevant. To reduce computation time, we scaled up all parameters so that evolutionary processes happen at an accelerated rate (see for example ref. <sup>48,48</sup>). In our model mutations happened at a rate of  $\mu=8.4 \times 10^{-7}$  per bp per generation (100 times the mutation rate of *Drosophila melanogaster*<sup>49</sup>). All mutations were deleterious ( $s < 0$ ), recessive, and only occurred in exons. The magnitudes of the fitness effects of mutations were drawn from a Gamma distribution  $\Gamma$  ( $\alpha=0.5$ ,  $\beta=10$ ).

Overall recombination rate was defined as the sum of the rate of single crossovers (CO) and gene conversion (GC) and corresponds to the rate of initialization of a recombination event. This was constant over the entire genome and all of the karyotypes. However, the success of this initialization differed between genomic regions and karyotypes. We use the term effective recombination rate to describe the difference in realized events between karyotypes due to crossovers being repressed in the inverted region in heterokaryotypes. We used the values provided by the literature for *D. melanogaster*, also scaled by a factor 100:  $\rho = 3.0 \times 10^{-6}$  per base pair per meiosis per base pair per meiosis<sup>17, 18</sup> for the crossing over rate and  $\gamma = 1.8 \times 10^{-6}$  per base pair per meiosis<sup>19</sup> for the rate of initiation of a gene conversion event. It should be noted that Slim does not allow for the possibility of double crossover events. Gene conversion length followed a Poisson distribution of parameter  $\lambda = 50$ . We divided the recombination rate by 2 (and therefore  $r = (\rho + \gamma)/2$ ) as recombination is generally restricted to females in *D. melanogaster* but occurs in all individuals in our model. This resulted in an overall recombination rate of  $r = 2.4 \times 10^{-6}$  per base pair per meiosis.

Following a burn-in of 200N generations to ensure that mutation-selection-drift equilibrium was attained, we assumed that an inversion happens in a random haplotype. The inversion occurred at a given position of the genome (50 kb to 80 kb) and encompassed 10% of the genome. We assumed that the inversion provided a small heterozygote advantage  $s_{HET} = 0.03$ . We considered the fate of the newly introduced inversion over the next 200N generations or until the loss of the inversion polymorphism. We tracked the fitness distribution of the various karyotypes and the inversion frequency over time. For a given haplotype, 100 replicates were used to estimate the invasion probability, both with and without gene conversion (but note that the overall recombination rate remained constant as gene conversion is coded in Slim as subtype of a recombination event). We performed this same analysis for 200 haplotypes from 100 random individuals. In addition to the 200 randomly chosen haplotypes, we also considered the fate of the four fittest and four least fit haplotypes. Please see Fig. S7 for how this choice affected the distribution of the mutational load. Slim scripts, analysis scripts, and the seeds used to run the various simulations can be found at <https://gitlab.com/evoldyn/inversion/wikis/home>.

## References

1. Dobigny G, Britton-Davidian J, Robinson TJ. Chromosomal polymorphism in mammals: An evolutionary perspective. *Biol Rev* **92**, 1-21 (2015).
2. Feuk L, *et al.* Discovery of human inversion polymorphisms by comparative analysis of human and chimpanzee DNA sequence assemblies. *Plos Genet* **1**, 489-498 (2005).
3. Kirkpatrick M. How and why chromosome inversions evolve. *Plos Biol* **8**, (2010).



4. Ayala D, Guerrero RF, Kirkpatrick M. Reproductive isolation and local adaptation quantified for a chromosome inversion in a malaria mosquito. *Evolution* **67**, 946-958 (2013).
5. Lowry DB, Willis JH. A widespread chromosomal inversion polymorphism contributes to a major life-history transition, local adaptation, and reproductive isolation. *Plos Biol* **8**, (2010).
6. Twyford AD, Friedman J. Adaptive divergence in the monkey flower *Mimulus guttatus* is maintained by a chromosomal inversion. *Evolution* **69**, 1476-1486 (2015).
7. Wellenreuther M, Bernatchez L. Eco-evolutionary genomics of chromosomal inversions. *Trends Ecol Evol* **33**, 427-440 (2018).
8. Faria R, Johannesson K, Butlin RK, Westram AM. Evolving Inversions. *Trends Ecol Evol* **34**, 239-248 (2019).
9. Eanes WF, Wesley C, Charlesworth B. Accumulation of P-Elements in minority inversions in natural populations of *Drosophila melanogaster*. *Genetical Research* **59**, 1-9 (1992).
10. Navarro A, Bardadilla A, Ruiz A. Effect of inversion polymorphism on the neutral nucleotide variability of linked chromosomal regions in *Drosophila*. *Genetics* **155**, 685-698 (2000).
11. Santos J, *et al.* Tracking changes in chromosomal arrangements and their genetic content during adaptation. *Journal of Evolutionary Biology* **29**, 1151-1167 (2016).
12. Fuller ZL, Koury SA, Phadnis N, Schaeffer SW. How chromosomal rearrangements shape adaptation and speciation: Case studies in *Drosophila pseudoobscura* and its sibling species *Drosophila persimilis*. *Molecular ecology*, (2018).
13. Navarro A, Betran E, Barbadilla A, Ruiz A. Recombination and gene flux caused by gene conversion and crossing over in inversion heterokaryotypes. *Genetics* **146**, 695-709 (1997).
14. Crown KN, Miller DE, Sekelsky J, Hawley RS. Local inversion heterozygosity alters recombination throughout the genome. *Curr Biol* **28**, 2984-2990 e2983 (2018).
15. Korunes KL, Noor MAF. Pervasive gene conversion in chromosomal inversion heterozygotes. *Molecular ecology*, (2018).

16. Haller BC, Messer PW. SLiM 2: Flexible, interactive forward genetic simulations. *Molecular biology and evolution* **34**, 230-240 (2016).
17. Betancourt AJ, Presgraves DC. Linkage limits the power of natural selection in *Drosophila*. *Proceedings of the National Academy of Sciences* **99**, 13616-13620 (2002).
18. Marais G. Biased gene conversion: Implications for genome and sex evolution. *Trends in Genetics* **19**, 330-338 (2003).
19. Miller DE, *et al.* A whole-chromosome analysis of meiotic recombination in *Drosophila melanogaster*. *G3* **2**, 249-260 (2012).
20. Nei M, Kojima KI, Schaffer HE. Frequency changes of new inversions in populations under mutation-selection equilibria. *Genetics* **57**, 741-750 (1967).
21. Felsenstein J. The evolutionary advantage of recombination. *Genetics* **78**, 737-756 (1974).
22. Kliman RM, Hey J. Reduced natural selection associated with low recombination in *Drosophila melanogaster*. *Molecular biology and evolution* **10**, 1239-1258 (1993).
23. Moran NA. Accelerated evolution and Muller's ratchet in endosymbiotic bacteria. *Proceedings of the National Academy of Sciences* **93**, 2873-2878 (1996).
24. Muller HJ. The relation of recombination to mutational advance. *Mutation Research/Fundamental and Molecular Mechanisms of Mutagenesis* **1**, 2-9 (1964).
25. Ohta T. Associative overdominance caused by linked detrimental mutations. *Genet Res* **18**, 277-286 (1971).
26. Kirkpatrick M, Barton N. Chromosome inversions, local adaptation and speciation. *Genetics* **173**, 419-434 (2006).
27. Santos M. The role of genic selection in the establishment of inversion polymorphism in *Drosophila subobscura*. *Genetica* **69**, 35-45 (1986).
28. Wasserman M. Factors influencing fitness in chromosomal strains in *Drosophila subobscura*. *Genetics* **72**, 691-708 (1972).
29. Cleland RE. *Oenothera; cytogenetics and evolution*. Academic Press (1972).

30. Dobzhansky T, Pavlovsky O. An extreme case of heterosis in a Central American population of *Drosophila tropicalis*. *Proceedings of the National Academy of Sciences* **41**, 289 (1955).
31. James S. Complex hybridity in *Isotoma petræa*. *Heredity* **20**, 341 (1965).
32. Lin YJ. Chromosome distribution and catenation in *Rhoeo spathacea* var. concolor. *Chromosoma* **71**, 109-127 (1979).
33. Macgregor HC, Horner H. Heteromorphism for chromosome-1 - Requirement for normal development in Crested Newts. *Chromosoma* **76**, 111-122 (1980).
34. Thien LB. Chromosome translocations in *Gayophytum* (Onagraceae). *Evolution* **23**, 456-465 (1969).
35. Charlesworth B, Charlesworth D. Rapid fixation of deleterious alleles can be caused by Muller's ratchet. *Genetical Research* **70**, 63-73 (1997).
36. Albornoz J, Dominguez A. Inversion polymorphism and accumulation of lethals in selected lines of *Drosophila melanogaster*. *Heredity* **73**, 92-97 (1994).
37. Yang YY, Lin FJ, Chang HY. Comparison of recessive lethal accumulation in inversion-bearing and inversion-free chromosomes in *Drosophila*. *Zool Stud* **41**, 271-282 (2002).
38. Crumpacker DW, Salceda VM. Chromosomal polymorphism and genetic load in *Drosophila pseudoobscura*. *Genetics* **61**, 859 (1969).
39. Dobzhansky T, Spassky B, Tidwell T. Genetics of natural populations. XXXII. Inbreeding and the mutational and balanced genetic loads in natural populations of *Drosophila pseudoobscura*. *Genetics* **48**, 361 (1963).
40. Butlin RK, Day TH. Genic and karyotypic selection on an inversion polymorphism in the seaweed fly, *Coelopa frigida*. *Heredity* **54**, 267-274 (1985).
41. Kim K-W, *et al.* A sex-linked supergene controls sperm morphology and swimming speed in a songbird. *Nat Ecol Evol* **1**, 1168 (2017).

42. Lindtke D, *et al.* Long-term balancing selection on chromosomal variants associated with crypsis in a stick insect. *Molecular ecology* **26**, 6189-6205 (2017).
43. Schaeffer SW. Selection in heterogeneous environments maintains the gene arrangement polymorphism of *Drosophila pseudoobscura*. *Evolution* **62**, 3082-3099 (2008).
44. Wellenreuther M, Merot C, Berdan E, Bernatchez L. Going beyond SNPs: the role of structural genomic variants in adaptive evolution and species diversification. *Molecular ecology*, (2019).
45. Nosil P, Funk DJ, Ortiz-Barrientos D. Divergent selection and heterogeneous genomic divergence. *Molecular ecology* **18**, 375-402 (2009).
46. Strasburg JL, Sherman NA, Wright KM, Moyle LC, Willis JH, Rieseberg LH. What can patterns of differentiation across plant genomes tell us about adaptation and speciation? *Philos T R Soc B* **367**, 364-373 (2012).
47. Yeaman S, Whitlock MC. The genetic architecture of adaptation under migration-selection balance. *Evolution* **65**, 1897-1911 (2011).
48. Charlesworth D, Morgan M, Charlesworth B. Mutation accumulation in finite outbreeding and inbreeding populations. *Genet Res* **61**, 39-56 (1993).
49. Haag-Liautard C, *et al.* Direct estimation of per nucleotide and genomic deleterious mutation rates in *Drosophila*. *Nature* **445**, 82 (2007).

## Acknowledgements

We thank the Bank lab for support and helpful comments on the study design and the manuscript. We thank I. Fragata for advice on study design and figures and A. Westram and K. Johannesson for helpful comments on the manuscript. E. B. was supported by a Marie Skłodowska-Curie fellowship 704920 - H2020-MSCA-IF-2015. R.K.B. was supported by the NERC and by ERC Advanced Grant 693030 - BARRIERS. C.B. is grateful for support by EMBO Installation Grant IG4152. A.B. and C.B. were supported by ERC Starting Grant 804569 - FIT2GO. This work was supported by Fundação Calouste Gulbenkian.

### **Author Contributions**

E.B. and R.K.B. conceived of the study. E.B. and A.B. designed the simulations. A.B. wrote the analysis scripts. A.B. and E.B. analyzed the data. C.B supervised the project. All authors interpreted the results and wrote the paper.

### **Competing interests**

The authors declare they have no competing interests.

### **Materials & Correspondence**

Requests for material and correspondence can be addressed to E.B ([emma.berdan@gmail.com](mailto:emma.berdan@gmail.com)) and A.B. ([blancaert.a@gmail.com](mailto:blancaert.a@gmail.com)).
