# Deleterious Mutation Accumulation and the Long-Term Fate of Chromosomal Inversions

Emma L. Berdan<sup>1,2\*#</sup>, Alexandre Blanckaert<sup>2\*#</sup>, Roger K. Butlin<sup>1,3</sup>, and Claudia Bank<sup>2</sup>

<sup>1</sup>Department of Marine Sciences, University of Gothenburg, Göteborg, Sweden

<sup>2</sup>Instituto Gulbenkian de Ciência, Oeiras, Portugal

<sup>3</sup>Department of Animal and Plant Sciences, University of Sheffield, Sheffield, UK

\*- These authors contributed equally to this work.

# - Corresponding authors: [emma.berdan@gmail.com](mailto:emma.berdan@gmail.com), [blancaert.a@gmail.com](mailto:blancaert.a@gmail.com)

## Abstract

1 Chromosomal inversions contribute widely to adaptation and speciation, yet they present a unique  
2 evolutionary puzzle as both their allelic content and frequency evolve in a feedback loop. In this  
3 simulation study, we quantified the role of the allelic content in determining the long-term fate of  
4 the inversion. Recessive deleterious mutations accumulated on both arrangements with most of  
5 them being private to a given arrangement. This led to increasing overdominance, allowing for  
6 the maintenance of the inversion polymorphism and generating strong non-adaptive divergence  
7 between arrangements. The accumulation of mutations was mitigated by gene conversion but  
8 nevertheless led to the fitness decline of at least one homokaryotype under all considered  
9 conditions. Surprisingly, this fitness degradation could be permanently halted by the branching of  
10 an arrangement into multiple highly divergent haplotypes. Our results highlight the dynamic  
11 features of inversions by showing how the non-adaptive evolution of allelic content can play a  
12 major role in the fate of the inversion.

13  
14  
15 **Keywords:** chromosomal inversion, Muller's Ratchet, associative overdominance, genic selection, non-  
16 adaptive divergence, balancing selection

17  
18  
19  
20  
21

## 22 **Author Summary**

23 A chromosomal inversion is a segment of the chromosome that is flipped (inverted arrangement) relative  
24 to the normal orientation (standard arrangement). Such structural mutations may facilitate evolutionary  
25 processes such as adaptation and speciation, because reduced recombination in inverted regions allows  
26 beneficial combinations of alleles to behave as a “single unit”. This locally reduced recombination can  
27 have major consequences for the evolution of the allelic content inside the inversion. We used simulations  
28 to investigate some of these consequences. Inverted regions tended to accumulate more deleterious  
29 recessive mutations than the rest of the genome, which decreased the fitness of homokaryotypes  
30 (individuals with two copies of the same arrangement). This led to a strong selective advantage for  
31 heterokaryotypes (individuals with one copy of each arrangement), maintaining the inversion  
32 polymorphism in the population. The accumulation of deleterious mutations also resulted in strong  
33 divergence between arrangements. We occasionally observed an arrangement that diverged into a small  
34 number of highly differentiated haplotypes, stopping the fitness decrease in homokaryotypes. Our results  
35 highlight the dynamic features of inversions by showing how the evolution of allelic content can greatly  
36 affect the fate of an inversion.

37

## 38 **Introduction**

39 Chromosomal inversions are large-scale structural mutations that may encompass millions of nucleotides  
40 and cause them to segregate together as a single unit due to repressed recombination. A surge of interest  
41 in inversions over the last 20 years has shown that inversions occur in a wide variety of taxa [1-3], are  
42 often found to have facilitated evolutionary processes such as adaptation and speciation [3-7], and are  
43 frequently under balancing selection [7]. However, we lack a solid understanding of how inversions  
44 themselves evolve and which factors determine their fate. Critically, inversions are dynamic and behave  
45 in qualitatively different ways from single-nucleotide polymorphisms (SNPs), since both their allelic  
46 content and their frequency can change over time. Incorporating this concept better into evolutionary  
47 theory will improve our ability to explain and predict the evolution of inversions in natural populations  
48 [8-11].

49 A key feature of inversions, and large structural variants in general, is that selection acts at multiple  
50 levels. There is direct selection on the inversion itself as the breakpoints alter the DNA sequence. The  
51 allelic content of the arrangements is also under selection, which generates indirect selection at the level  
52 of the inversion through linkage disequilibrium. As a consequence of this indirect component, selection

53 on inversions may be overdominant due to the presence of recessive deleterious alleles, unique to each  
54 arrangement [12].

55 Another key feature governing the evolution of inversions is the reduction in effective recombination  
56 between the standard (S) and inverted (I) arrangements. Recombination proceeds normally in both  
57 homokaryotypes (II and SS). However, in heterokaryotypes (IS), single crossovers can lead to unbalanced  
58 chromosomes and therefore inviable gametes (but see [13] for other mechanisms of recombination  
59 repression). Thus, only gene conversion and double crossovers (in larger inversions) contribute to gene  
60 flux (i.e. genetic exchange between arrangements [14]), although recent studies have demonstrated that  
61 gene conversion occurs at normal or higher rates in inverted regions [15, 16]. Due to the partial repression  
62 of recombination, the arrangements behave like independent populations that exchange migrants. Thus,  
63 the arrangements suffer from a reduced population size when compared to the rest of the genome; within  
64 each arrangement, selection is less effective and genetic drift stronger. This effect is expected to be weak  
65 when an arrangement is at intermediate or high frequency but strong when it is rare [10, 17].

66  
67 This pseudo-population-substructure only affects the inverted region and affects both standing genetic  
68 variation and the fate of new mutations. In particular, the decrease in effective population size mentioned  
69 above leads to a reduction in the efficacy of purifying selection, making the two arrangements more  
70 vulnerable to the maintenance and possible fixation of deleterious mutations. This expected  
71 overabundance of deleterious alleles has been reported in the literature across several taxa such as  
72 seaweed flies *Coelopa frigida* [18], *Drosophila melanogaster* [8, 19-22], and *Heliconius* butterflies [23].

73  
74 In the theoretical literature, the role of recessive deleterious mutations has been addressed previously,  
75 mainly regarding the invasion of an inverted arrangement [24-26]. However, the long-term consequences  
76 of the reduction in efficacy of purifying selection have not been explored. This is of importance because  
77 the efficacy of selection is governed by the frequencies of the different karyotypes (II, IS, and SS). In  
78 turn, the allelic content of the inverted and standard arrangements determines their marginal fitness and  
79 therefore the frequencies of the different karyotypes. This creates a dynamic feedback loop between the  
80 frequency and the allelic content of the arrangements, which has to date received little attention in the  
81 literature. The effect is not included, for example, in the influential coalescent models of Navarro et al.  
82 [10] and Guerrero et al. [17] where arrangement frequencies are determined solely by direct selection on  
83 the inversion or indirect selection due to inclusion of locally-adapted alleles [as in 27].

84

85 Here we explore the effects of this feedback loop by modelling how the allelic content of an inversion  
86 evolves during its lifetime and significantly impacts its long-term fate. Using Slim v2.6 [28], a forward  
87 simulation program, we quantify changes in the allelic content of the inverted region over time and  
88 elucidate the role of gene conversion in preventing the accumulation of recessive deleterious mutations.  
89 We find that the minority arrangement, which experiences the stronger decrease in population size,  
90 accumulates mutations rapidly, leading to a swift decline in the fitness of the corresponding  
91 homokaryotype. In smaller populations, this process also occurs in the majority arrangement, potentially  
92 resulting in a balanced lethal system. We identify a mechanism that can stop the fitness degradation of  
93 homokaryotypes, which we term ‘haplotype structuring’. We discuss how our theoretical predictions can  
94 be validated empirically, and highlight the relevance of our results to other scenarios of low  
95 recombination.

96

## 97 **Results**

### 98 **Simulations**

99 We modeled an isolated population of diploid individuals at initial mutation-selection balance using  
100 SLiM v2.6 [28]. We simulated a population of  $N=25,000$  (with a subset of simulations run for  $N=5,000$ )  
101 diploid individuals. The genome consisted of three chromosomes of 1Mb, 300 kb of which were coding  
102 regions where allelic content was simulated. The allelic content of the rest of the chromosome was not  
103 simulated to alleviate the computational load, although recombination could occur anywhere. Coding  
104 regions were modelled as 50 kb segments, separated from each other by 100 kb of non-coding regions  
105 (i.e. areas where allelic content was not simulated).

106

107 To calibrate our model, we chose parameter estimates inspired by *Drosophila melanogaster* [29-31]. In  
108 our model, mutations happened at a rate of  $\mu=8.4 \times 10^{-9}$  per bp per generation [32]. All simulated  
109 mutations were deleterious ( $s < 0$ ), recessive, only occurred in coding regions, and affected individual  
110 fitness multiplicatively. The magnitudes of fitness effects of deleterious mutations ( $|s|$ ) were drawn from a  
111 Gamma distribution  $\Gamma(\alpha=0.5, \beta=100)$ . To reduce computation time we did not simulate neutral mutations  
112 but 5% of *de novo* mutations were effectively neutral (i.e.  $|s| < 1/(2N)$ ). Overall recombination rate was  
113 defined as the sum of the rate of single crossovers (CO,  $\rho = 3.0 \times 10^{-8}$  per base pair per meiosis [29, 30])  
114 and gene conversion (GC,  $\gamma = 1.8 \times 10^{-8}$  per base pair per meiosis [31] for the rate of initiation of a gene  
115 conversion event) and corresponded to the rate of initialization of a recombination event. This overall rate  
116 was constant along the genome and for all karyotypes. However, the success of recombination  
117 initialization differed between genomic regions and karyotypes. We use the term effective recombination

118 rate to describe the difference in realized events between karyotypes due to crossover suppression in the  
119 inverted region in heterokaryotypes. It should be noted that SLiM (in its 2.6 version) did not allow for the  
120 possibility of double crossover events. Gene conversion track length followed a Poisson distribution with  
121 parameter  $\lambda = 500$  bp [31]. As recombination is generally restricted to females in *D. melanogaster* but  
122 occurs in all individuals in our simulation, we divided the overall recombination rate by 2 (and therefore  $r$   
123  $= (\rho + \gamma)/2$ ), resulting in  $r = 2.4 \times 10^{-8}$  per base pair per meiosis.

124  
125 Simulation with these parameters was not feasible because of the extremely large computational burden.  
126 To reduce computation time while maintaining the same evolutionary scenario, we used the common  
127 practice of rescaling parameters so that evolutionary processes happened at an accelerated rate (see for  
128 example [33]). A recent paper showed that such rescaling may fail to represent the original population  
129 genetics accurately when the product of  $2N_s$  is very large [34]. However, this should not be an issue in  
130 our simulations as we remain in the parameter space where using rescaled parameters should not  
131 significantly affect the genetic diversity of the population. We thus downscaled both population size and  
132 genome length by a factor 10 and upscaled the remaining parameters so that  $2N_\mu L$ ,  $2N_s$ ,  $2NrL$ ,  $\lambda/L$  (with  
133  $L$  the length of the genome) remained constant.

134  
135 Following a burn-in of 500,000 generations to ensure that mutation-selection-drift equilibrium was  
136 attained, we assumed that an inversion occurs in a random haplotype (i.e. the random haplotype becomes  
137 the inverted arrangement and the remaining haplotypes become the standard arrangement). The inversion  
138 occurred between two given loci on chromosome one and encompassed 30% of the chromosome and 10%  
139 of the genome. In order to ensure that a reasonable proportion of new inversions remained polymorphic  
140 for long enough to observe the effects of deleterious mutations, we assumed that the inversion provided a  
141 small heterozygote advantage  $s_{\text{HET}} = 0.003$  or  $2N_s s_{\text{HET}} = 150$ . We followed the fate of the newly introduced  
142 inverted arrangement over the next 500,000 generations or until the loss of the inversion polymorphism.  
143 We recorded the fitness distribution of the various karyotypes and the inversion frequency over time. For  
144 a given haplotype, 100 replicates were used to estimate the invasion probability, both with and without  
145 gene conversion. We performed the same analysis for 200 haplotypes from 100 random individuals. In  
146 addition to the 200 randomly chosen haplotypes, we also considered the fate of the four fittest and four  
147 least fit haplotypes (see Figure S1 for how this choice affected the mutational load of the inversion  
148 haplotype).

149  
150 To further explore the parameter space, we performed additional simulations for the four fittest  
151 haplotypes. In order to ascertain the effect of  $s_{\text{HET}}$  on the fate of the inversion we investigated a range of

152 other heterozygote advantages:  $s_{\text{HET}} = 0$ ,  $s_{\text{HET}} = 0.0003$  or  $2N_{\text{SHET}} = 15$ , and  $s_{\text{HET}} = 0.006$  or  $2N_{\text{SHET}} =$   
153 300. To explore the effect of GC, we included 9 additional initiation rates of GC (equally distributed  
154 between 0 and  $1.8 \times 10^{-8}$  per base pair per meiosis). We also considered an inversion encompassing 20%  
155 of the genome, to explore the role of the size of an inversion on its fate. Finally, we also considered a  
156 smaller population size ( $N=5,000$ ). All SLiM scripts, analysis scripts, and the seeds used to run the  
157 simulations are available at <https://gitlab.com/evoldyn/inversion/wikis/home>.

## 158 **The Fate of the Inversion**

159  
160 We first quantified the fate of the inverted arrangement, with and without the presence of gene  
161 conversion, over the short-term (i.e., if the polymorphism was maintained over the first 10,000  
162 generations *versus* fixation or loss) and long-term (i.e., if the polymorphism was maintained over  
163  $>500,000$  generations *versus* fixation or loss). Gene conversion had little to no effect on the short-term  
164 fate (Figure 1a) of the inverted arrangement but increased the probability that the inversion was fixed or  
165 lost in the long term (Figure 1b). Without GC, the long-term fate of the inversion was decided within the  
166 initial  $\sim 60,000$  generations after appearance of the inversion (Figure 1f; no losses were observed after  
167 generation 58,620). At high GC rates, this was no longer true: even if the inverted arrangement  
168 successfully invaded, a risk of losing the polymorphism through genetic drift remained (Figure 1d). This  
169 occurs when the GC rate is high enough to partly compensate for the lack of crossing over in  
170 heterokaryotypes, which partially erases the pseudo-population substructure created by the inversion. At  
171 high rates of GC, the mutational load of the majority arrangement, usually the standard, remains low  
172 through two processes. First, purifying selection remains effective in the majority arrangement due to its  
173 high frequency. Second, mutations spread between arrangements and thus neither contribute to fitness  
174 differences between the karyotypes nor impact the fate of the inversion. Under soft selection, i.e., when  
175 there are always enough offspring produced to reach carrying capacity, fitness is relative. Therefore, the  
176 fixation of deleterious mutations in the whole population does not count towards the mutational load. The  
177 high marginal fitness of the majority arrangement, due to this effective removal of deleterious alleles,  
178 increases its frequency making fixation through genetic drift more likely, which results in the loss of the  
179 inversion polymorphism.

180 Nei and colleagues postulated that an inverted arrangement should be able to spread in a population  
181 without additional selective advantage only if it captures a haplotype with low mutational load compared  
182 to the rest of the population [24]. This is because inversions originate in a single haplotype; therefore, any  
183 inversion homokaryotype (II) will be homozygous for all deleterious recessive mutations present in the  
184 original haplotype. Standard homokaryotypes (SS) do not suffer from their mutational load because on

185 average they are homozygous for very few deleterious recessive mutations. Thus, only a few inversion  
186 homokaryotypes (II) have a fitness equal to or higher than the mean fitness of the standard  
187 homokaryotypes (SS) (Figure S2). In agreement with Nei's analytical results, we also recovered this  
188 pattern in the presence of *de novo* mutation (Nei only considered existing standing genetic variation): we  
189 observed fixation of the inverted arrangement when the inversion occurred in a haplotype with a low  
190 mutational load (Figure 1e). In the absence of any initial heterozygote advantage ( $s_{\text{HET}}=0$ ), both invasion  
191 (with probability 0.0082) and fixation (with probability 0.003) were possible, although extremely rare. In  
192 addition, we were able to determine that the presence of gene conversion, a lower  $s_{\text{HET}}$  value (Figure S3),  
193 and a smaller population size ( $N=5,000$  Figure S4) all increased the probability of fixation of the inverted  
194 arrangement, given invasion has been successful). This is because fixation is only possible if the fitness of  
195 the inverted homokaryotype remains similar to the fitness of the heterokaryotype, requiring a low  
196 mutational load of the inverted arrangement. In line with this, if heterokaryotype advantage (caused by  
197 deleterious or beneficial mutations), i.e. balancing selection, is the driving evolutionary force, fixation  
198 will not occur.

199

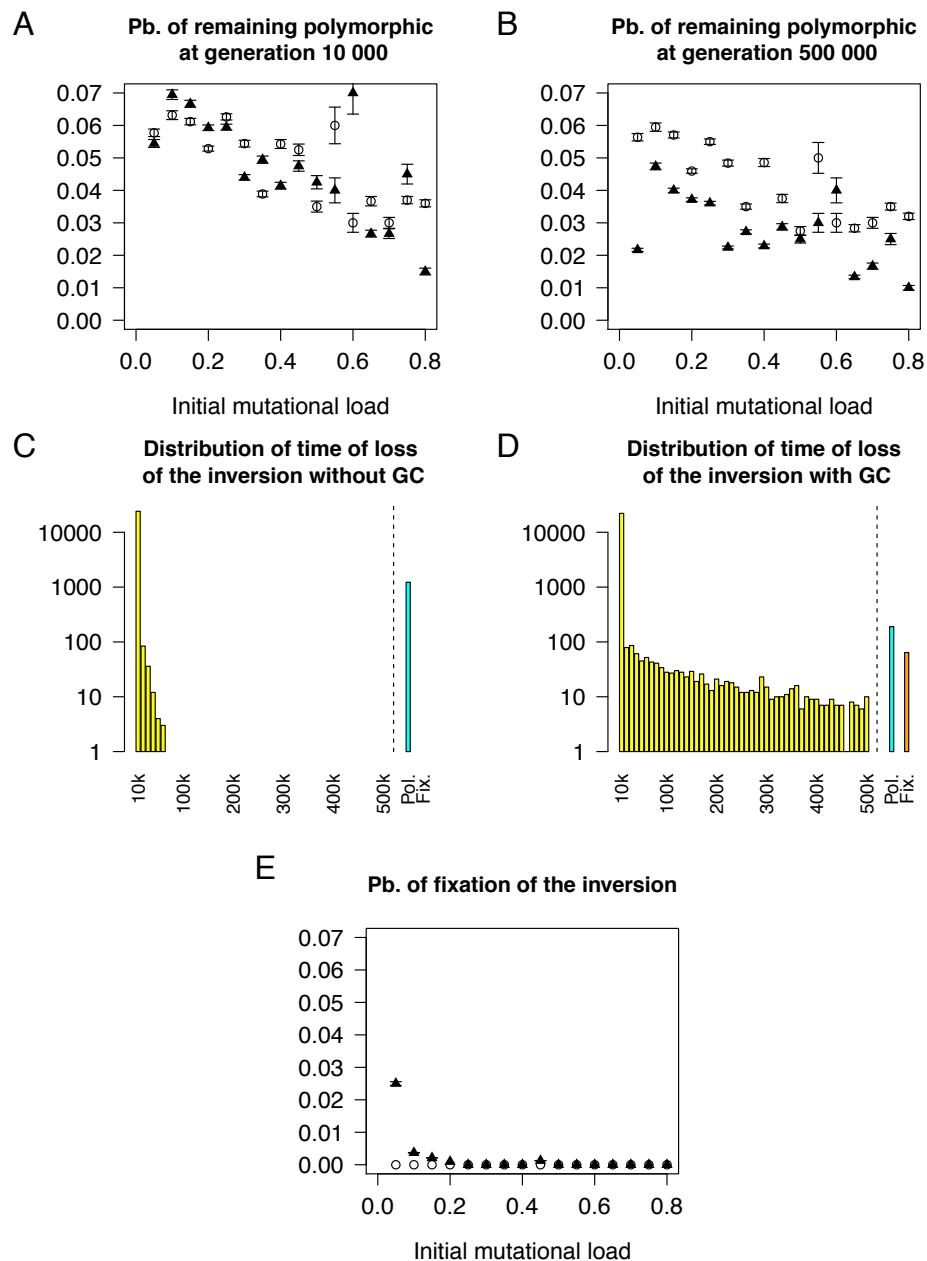

200

201 **Figure 1.** Gene conversion increases the probability that an inversion is fixed or lost. (A) Probability of the  
 202 inversion being polymorphic at generation 10,000 as a function of the mutational load in the presence (filled) and  
 203 absence of GC (empty). (B) Probability of the inversion remaining polymorphic at generation 500,000 as a function  
 204 of the mutational load in the presence (filled) and absence of GC (empty). (C) Distribution of the time of loss of the  
 205 inversion in the presence of GC. Simulations where the inversion remained polymorphic (cyan) or fixed (orange) are  
 206 indicated specifically. (D) Distribution of the time of loss of the inversion in the absence of GC. Simulations where  
 207 the inversion remained polymorphic (cyan) or fixed (orange) are indicated specifically. (E) Probability of fixation of  
 208 the inversion as a function of the mutational load in the presence (filled) and absence of GC (empty).

209

## Mutation Accumulation Occurs Inside Chromosomal Inversions

210



211 Our results reveal that the content of both the inverted and standard arrangements can change  
212 dramatically through the accumulation of recessive deleterious mutations (Figure 2). Generally, the  
213 fitness dropped more steeply in the inverted arrangement, but this pattern was reversed when the  
214 inversion occurred in a high-fitness haplotype and the inverted arrangement became the majority  
215 arrangement. Importantly, whenever the inversion invaded, both arrangements suffered a decrease in both  
216 effective population size and effective recombination rate. This decrease in effective recombination rate is  
217 due (1) to the absence of crossing over between arrangements and (2) to the reduction in effective  
218 population size for each arrangement, leading to a reduction in effective recombination rate within  
219 homokaryotypes. This had two important consequences. First, most new mutations remained private to  
220 the arrangement they occurred in. Second, recessive deleterious mutations accumulated in the  
221 arrangements (Figure 2b,d,f). This accumulation process was unaffected by the strength of the added  
222 heterokaryotype advantage (or its presence) in our model (Figure S3). The size of the inversion did not  
223 change this process qualitatively although the larger inversion accumulated slightly more mutations (per  
224 kb) in the major arrangement in the absence of GC (Figure S5). Accordingly, each arrangement  
225 experienced a process similar to Muller's ratchet, which is the step-wise stochastic loss of haplotypes with  
226 the lowest mutational load in the absence of sufficient recombination [35-40]. Despite the accumulation  
227 of deleterious mutations, the inversion remained in the population due to the increasing heterokaryotype  
228 advantage. This is sometimes referred to as associative overdominance which is caused by linkage  
229 disequilibrium between the inversion and alleles within it that confer heterozygote advantage. Both  
230 overdominant as well as recessive deleterious alleles may contribute to this phenomenon [3, 9, 25]. In our  
231 model, associative overdominance is generated by the presence of private recessive deleterious alleles at  
232 different loci in the two arrangements. The inversion polymorphism is therefore maintained by genic  
233 selection where inversions act as neutral vehicles of selected alleles, *sensu* Wasserman [26, 41]. Thus,  
234 deleterious mutation accumulation provides the raw material upon which genic selection acts, leading to  
235 the maintenance of the inversion polymorphism.

236  
237 The level of gene flux (i.e. genetic exchange between the two arrangements), determined solely by gene  
238 conversion in our model, is a key factor in determining the allelic content of the arrangements. As  
239 illustrated in Figure S6, both the number of mutations and the mutational load of a given arrangement  
240 decrease in an exponential-like fashion with an increase in GC rate. However, the major and minor  
241 arrangements were differentially affected. While the minority arrangement always accumulated mutations  
242 at a much faster rate than the majority arrangement, the addition of gene conversion to the model  
243 decreased the number of deleterious mutations in both arrangements (Figure 2b,f). On average, both the  
244 majority and minority arrangement had > 20 times more mutations in the absence of GC (majority

245 arrangement: 23x, 95% confidence interval (CI) from bootstrapping: 18.3-29.0; minority arrangement:  
246 28x, 95% CI 15.3-53.4). Yet the fitness of the two arrangements was not equally affected by high GC  
247 rates. The fitness of the majority homokaryotype was scarcely affected by mutation accumulation  
248 (because a small decrease in its population size resulted in a slightly larger mutational load), whereas the  
249 fitness of the minority homokaryotype decreased to  $\sim 0$  ( $<10^{-3}$ ). Non-zero GC rates allowed both  
250 mutations and ancestral alleles to move between arrangements and fix in the whole population, which  
251 reduced divergence between arrangements (see below) and aided the purging of deleterious mutations.  
252 We only observed a single instance whereby purging of deleterious mutations allowed the fitness of an  
253 arrangement to recover successfully from close to 0 (see Supplemental Text). At low GC rates, the global  
254 fixation rate of mutations within the inverted region (i.e. mutations that spread across arrangements) was  
255 reduced (see cyan line, Figure 2b,d). However, at sufficiently high GC rates, mutations could spread  
256 across arrangements and fix in the whole population at a similar rate to the collinear genomic regions (see  
257 cyan line, Figure 2f). Thus, the mutational load of the individual arrangements remains lower at high GC  
258 rates, but ancestral alleles can be irreversibly lost from the whole population.

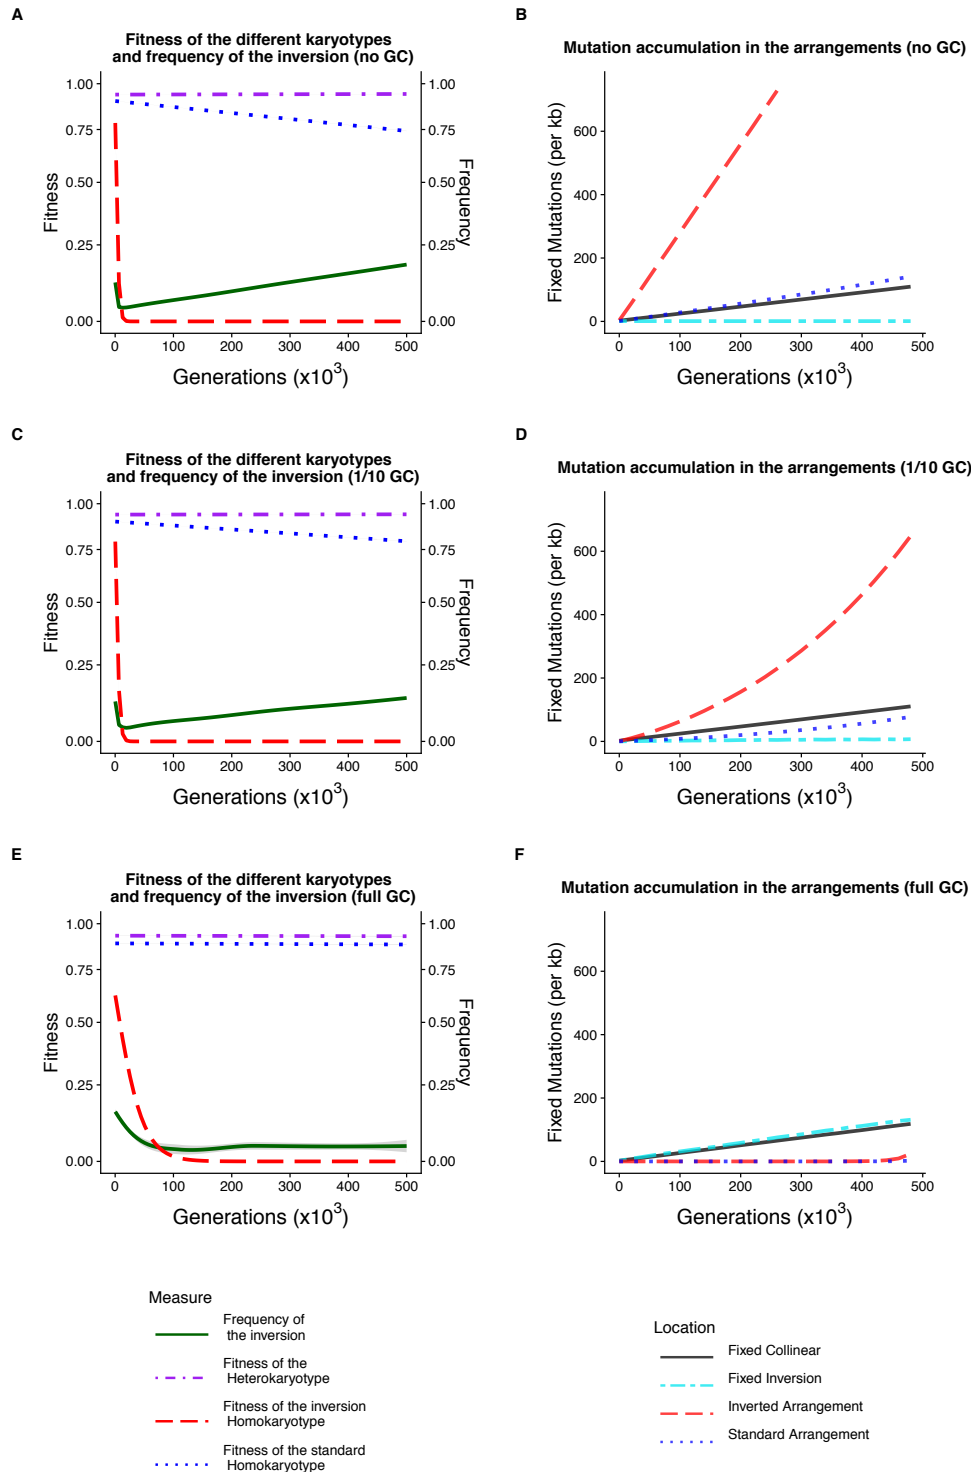

259

260 **Figure 2.** Fitness decay of the homokaryotypes and accumulation of mutations in the different arrangements  
 261 (A,C,E). Fitness of the different karyotypes for the inversion and frequency (green) of the inversion over 500,000  
 262 generations following the introduction of the inversion (starting at generation 200 after introduction) under (A)  
 263 a scenario with no gene conversion, (C) a scenario with 1/10 of the *D. melanogaster* gene conversion rate, and (E)  
 264 a scenario with the *D. melanogaster* gene conversion rate. (B,D,F) Corresponding cumulative distribution of fixed  
 265 mutations per kb in the inverted arrangement (red), the standard arrangement (blue), the inverted region (turquoise),

266 and in the collinear region (black) depending on the generation when the mutation appears. Results were obtained  
267 from 1,000 replicates where we only display successful maintenance of the inversion polymorphism (5 cases with a  
268 high rate of GC, 60 cases with 1/10 of the previously used GC rate GC, and 61 cases without GC).  
269

270 The population size also has a strong impact on the long-term fate of the inversion. In larger populations,  
271 mutation accumulation was either stopped or bypassed (see Section *Appearance of Haplotype Structuring*  
272 below) and only the minority homokaryotype became inviable (defined here as having an average relative  
273 fitness  $< 0.001$ ). This was always the case at high GC rates and almost always in its absence (1218/1227  
274 99.3% of completed runs). In small populations, weaker purifying selection led to an additional  
275 evolutionary outcome where both homokaryotypes became inviable. In this case, only heterokaryotypes  
276 contributed to subsequent generations. This long-term outcome was observed both in the absence of GC  
277 (56/56 test cases in which the inversion polymorphism remained) and at high rates of gene conversion  
278 (10/15 test cases in which the inversion polymorphism remained). Thus, at small population sizes, an  
279 inversion polymorphism may trigger the development of a balanced lethal system, various cases of which  
280 have been observed in nature [42-47].

## 281 **Mutation accumulation causes strong divergence between arrangements**

282

283 Whenever the inverted arrangement invaded, mutation accumulation within each arrangement resulted in  
284 fixed differences between the inverted and standard arrangement (Figure 3a,b). Unsurprisingly, more  
285 fixed differences accumulated in the absence of gene conversion (average number of fixed mutations  
286 without GC:  $4,609 \pm 7$ ) than in its presence (average number of fixed mutations with GC:  $182 \pm 2$ ). This  
287 strong between-arrangement divergence was reflected in high overall  $F_{ST}$  values between arrangements  
288 within the inverted region, compared with little divergence across the rest of the chromosome (Figure 3).  
289 Notably, no beneficial mutations are necessary for the buildup of the between-arrangement divergence.  
290 To better understand the role of purifying selection, we can separate the deleterious mutations into two  
291 categories: effectively neutral mutations (i.e.  $|s| < 1/(2N)$ ) and deleterious mutations. In our simulations,  
292 about 5% of new deleterious mutations are effectively neutral considering the total population size. If  
293 purifying selection is a potent force, we expect most fixed mutations to be effectively neutral. We find  
294 that purifying selection in large populations was relatively effective in collinear regions as ~50% of the  
295 fixed mutations were effectively neutral (Figure S7). However, within the two arrangements, the  
296 effectiveness of purifying selection was strongly decreased, particularly in the minor arrangement. This is  
297 evidenced by the proportion of effectively neutral fixed mutations in simulations without GC (majority  
298 arrangement:  $46.1\% \pm 0.1\%$ ; minority arrangement:  $5.2\% \pm 0.03\%$ ). The presence of GC altered the  
299 number of fixed mutations within arrangements (see above) but barely affected the proportion of

300 effectively neutral fixed mutations (majority arrangement:  $43.6\% \pm 0.9\%$ ; minority arrangement:  $5.4\% \pm$   
301  $0.1\%$ ). Surprisingly, some fixed mutations were very strongly deleterious (Figure S8). Both the strong  
302 within-arrangement divergence and the observation of less effective purifying selection support the  
303 interpretation of an inversion as a region of the genome that experiences population-substructure.

304

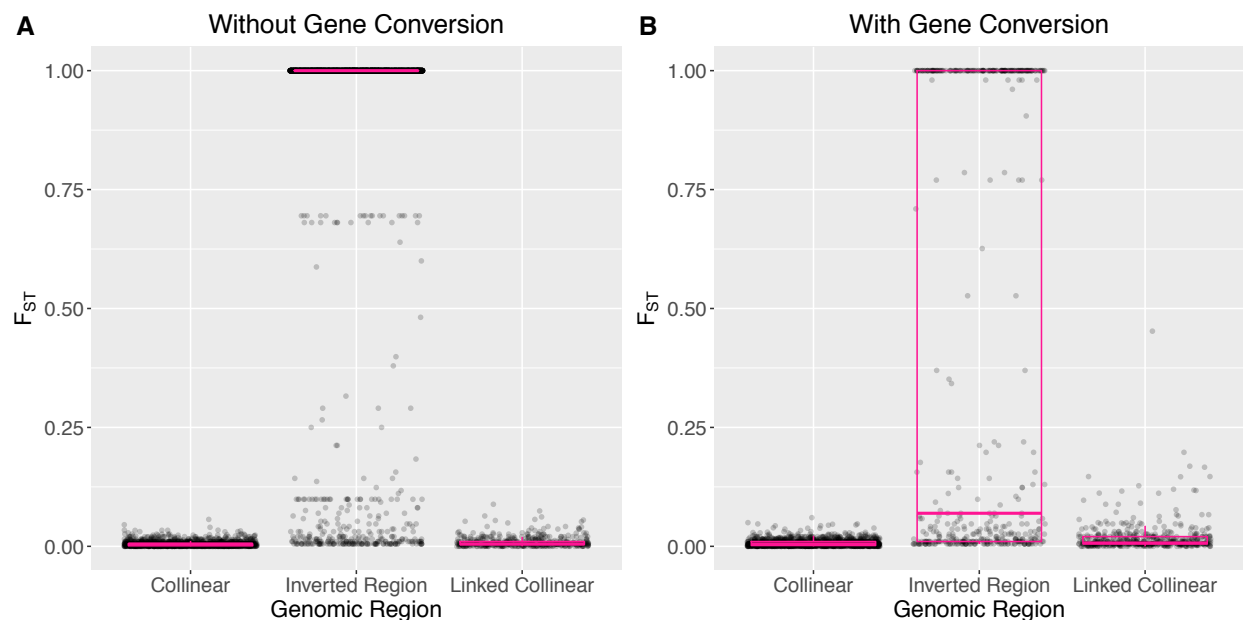

305

306 **Figure 3.** Divergence between karyotypes in the collinear, inverted, and linked regions. Linked regions are on the  
307 same chromosome as the inverted region but not within it. Each dot represents a single SNP and boxplots are  
308 overlain in pink. (A).  $F_{ST}$  without gene conversion, (B).  $F_{ST}$  with gene conversion.

309

## 310 Appearance of haplotype structuring

311

312 The fitness degradation of one or both arrangements that we describe above was occasionally halted by a  
313 mechanism we term *haplotype structuring* if GC rate was low enough (Figure S6). When haplotype  
314 structuring occurred, the subpopulation of one arrangement split into two or more divergent haplotype  
315 clusters that carried partially complementary sets of deleterious recessive alleles (see Figure 4 & 5). Here,  
316 homokaryotypes with two divergent haplotypes that each have a high mutational load are still relatively  
317 fit (e.g.  $I_j I_k$  and  $S_j S_k$ ) because deleterious mutations are masked when divergent haplotypes are paired.  
318 Notably, this is equivalent to what is happening in heterokaryotypes (IS). Homokaryotypes with similar  
319 haplotypes (e.g.  $I_j I_j$  or  $S_j S_j$ ) tend to be inviable because the mutational load is no longer masked. This  
320 means that the fitness distribution of a given homokaryotype (e.g. II) has two modes; one corresponding

321 to extremely unfit individuals and the other to relatively fit ones (see Figure 5 for a schematic). Thus, a  
322 signature of haplotype structuring in a given arrangement is that the fitness of the corresponding  
323 homokaryotypes shifts from a unimodal to a bimodal distribution (Figure S9). We also recover this result  
324 in the absence of direct heterozygote advantage for the inversion ( $s_{\text{HET}} = 0$ ). Figure S10 depicts an  
325 outcome similar to Figure 4B: haplotype structuring in the major arrangement. When haplotype  
326 structuring occurs, the expected equilibrium frequency of the inversion tends to be close to 0.5, due to the  
327 large fitness advantage of the heterokaryotypes over the homokaryotypes. However, the expected  
328 equilibrium frequency still depends on the marginal fitness of the two homokaryotypes (Figure 4B, 4D),  
329 and will only be equal to 0.5 if the mutational load is, and remains the same in both arrangements (the  
330 balanced lethal case is one such example, Figure 4A).

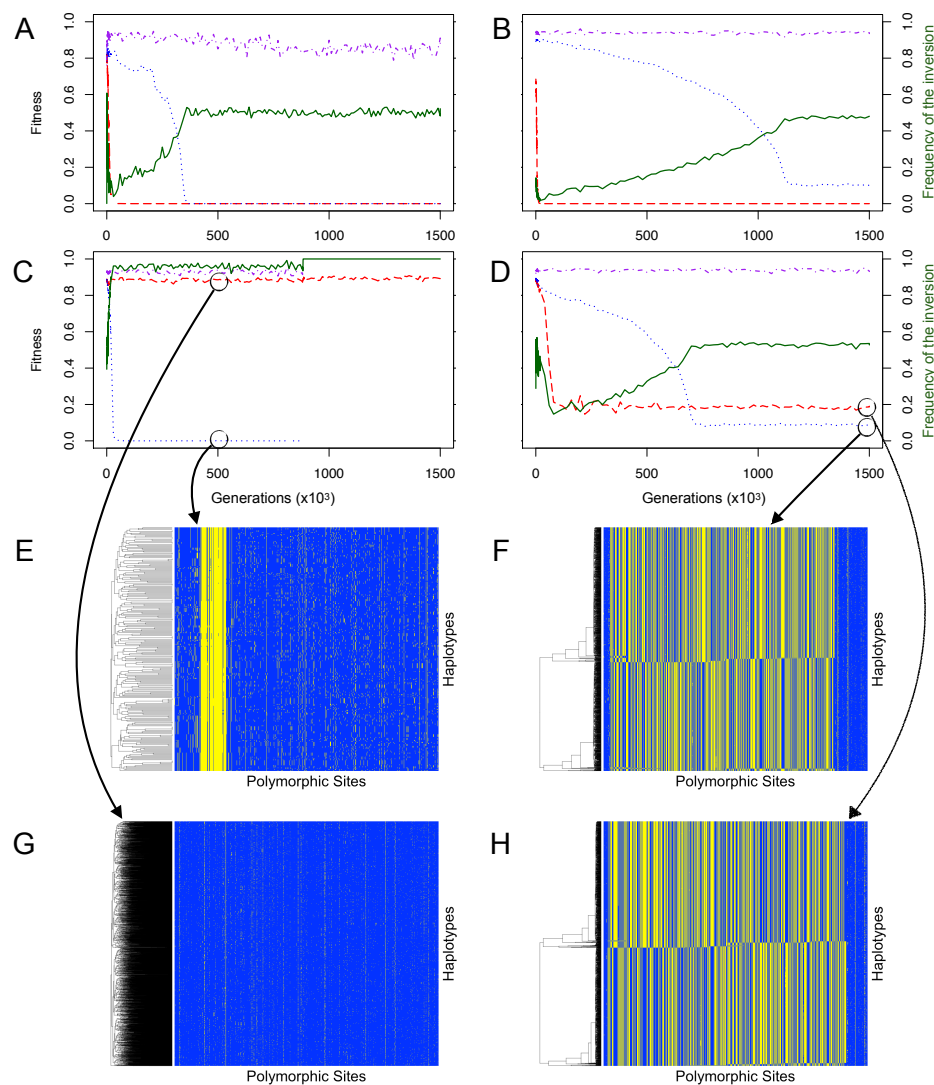

331

332

333 **Figure 4.** Different evolutionary outcomes (A-D) and allelic content of the arrangements (E-H). (A-D) represent the  
 334 fitness of the different karyotypes as well as the frequency of the inversion for all 4 outcomes. Fitness of the  
 335 standard homokaryotype is given by the dotted blue line, of the inverted homokaryotype by the red dashed line and  
 336 of the heterokaryotype by the dash-dotted purple line. The frequency of the inversion is given by the solid green  
 337 line. (A) Balanced lethals, (B) inverted homokaryotype is inviable, standard homokaryotype remains viable through  
 338 haplotype structuring: (C) inverted homokaryotype is viable, standard homokaryotype is inviable until the inversion  
 339 fixes, (D) haplotype structuring in both the inverted and standard arrangements. (E-H) Allelic content of the  
 340 inversion, each horizontal line represents a haplotype in the population and each vertical line represents a genomic  
 341 locus. Yellow denotes that an individual possesses the derived allele and blue the ancestral one. The black circle  
 342 indicates where the haplotypes were taken from. (E) Mutation accumulation in the minor arrangement, (F) haplotype  
 343 structuring in the standard arrangement, (G) purifying selection in the majority arrangement, (H) haplotype  
 344 structuring in the inverted arrangement.

345

346

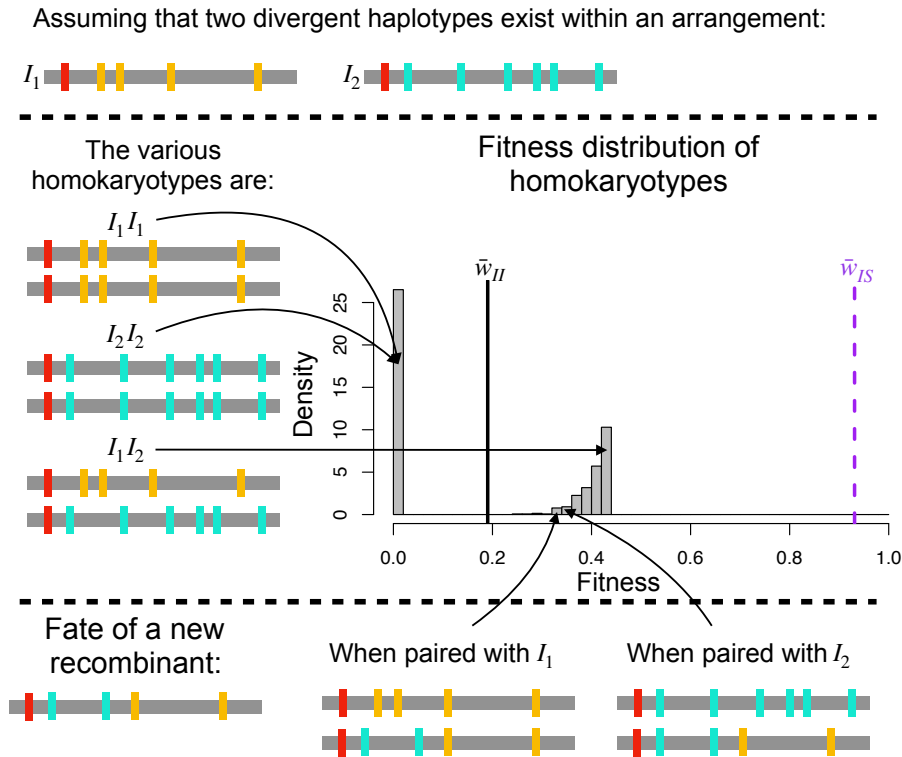

347

348 **Figure 5.** Schematic representation of the consequences of haplotype structuring on the fitness distribution of the  
 349 homokaryotypes. Red, cyan, and mustard represent deleterious mutations. Homokaryotypic homozygotes have a  
 350 fitness near 0 while homokaryotypic heterozygotes have a positive fitness, as only the mutations that are fixed in the  
 351 arrangements (in red) are expressed, while the mutations unique to each haplotype (in mustard and cyan) are masked.  
 352 This leads to the bimodal distribution of fitness illustrated here. For reference the vertical lines correspond  
 353 to the mean fitness of heterokaryotypes (dashed purple) and homokaryotypes (black line). Haplotype structuring is  
 354 stable against recombination as the new recombinant will express both mustard and cyan mutations, leading to a  
 355 lower fitness, whenever it is associated with either of the two major haplotypes.

356

357

358 Haplotype structuring requires a significant level of within-arrangement diversity. Namely, the mutational  
 359 load of the segregating haplotypes has to be high to create a large fitness difference between  
 360 homokaryotype homozygotes (e.g.  $I_jI_j$  or  $S_jS_j$ ) and homokaryotype heterozygotes (e.g.  $I_jI_k$  or  $S_jS_k$ ), which  
 361 in turn generates within-arrangement genic selection. Therefore, haplotype structuring is not possible in  
 362 small populations or at high GC rates. Indeed, we only observed haplotype structuring with GC rates  $\gamma \leq$   
 363  $5.4 \times 10^{-9}$  (Figure S6). At high GC rates, the mutational load of the majority arrangement is not  
 364 sufficiently large for haplotype structuring to occur and there are not enough copies of the minority  
 365 arrangement present to create the necessary diversity. Similarly, in small populations, the haplotype



366 diversity necessary for haplotype structuring cannot build up or be maintained because it is overwhelmed  
367 by the diversity-reducing force of genetic drift.

368  
369 The divergent haplotype clusters that result from haplotype structuring are stable and are not disrupted by  
370 recombination. This is because recombination between divergent haplotypes creates new haplotypes that  
371 expose deleterious recessive mutations to selection when paired with either one of the parental  
372 haplotypes. Therefore, any recombinant haplotype is swiftly removed from the population even though its  
373 deleterious mutations are not exposed to selection in a heterokaryotype. Haplotype structuring has  
374 previously been described by Charlesworth and Charlesworth in a model of a diploid non-recombining  
375 population with deleterious recessive mutations [48]. To confirm this similarity, we triggered haplotype  
376 structuring in simulations of whole genomes with greatly reduced recombination rates. In these  
377 simulations, haplotype structuring was possible across the full range of GC rates we tested as long as  
378 crossing-over rates were low (20% or less of our default value, Figure S11). Thus, similar to how  
379 heterokaryotype advantage maintains an inversion polymorphism, heterozygote advantage at the level of  
380 the haplotype maintains the haplotype polymorphism (i.e. haplotype structuring). Importantly, although  
381 haplotype structuring halts the fitness decay of homokaryotypes, mutation accumulation continues.

382

## 383 **Discussion**

384

385 Chromosomal inversions are dynamic variants that behave in qualitatively different ways from other  
386 polymorphisms (SNPs, indels). Specifically, both their allelic content and their frequency change over  
387 time, leading to two intertwined levels of evolution. We demonstrate here that the allelic content of an  
388 arrangement can degrade via a Muller's ratchet-like process. While the inversion remains polymorphic in  
389 the population, we observe an accumulation of deleterious recessive mutations in one or both of the  
390 arrangements, which can result in at least one of the homokaryotypes becoming inviable. In our  
391 simulations, this fitness decay is slowed by gene conversion but can only be stopped by haplotype  
392 structuring, the appearance of multiple highly-divergent haplotypes within an arrangement. Together, our  
393 results imply that inversions observed in nature can be substantially different from the original invader  
394 even without the action of directional selection. Furthermore, we predict that they may harbor sub-  
395 haplotypes within arrangements that can distort population genetic statistics.

396

397 We show that a mutation accumulation process similar to Muller's ratchet happens within the  
398 arrangements that experience a reduced effective recombination rate and a reduced effective population

399 size. These reductions decrease the efficacy of purifying selection resulting in an excess of deleterious  
400 mutations within the inverted region compared to the rest of the genome. This relationship between  
401 recombination and the efficacy of selection is well documented [49-51]. The increased accumulation of  
402 deleterious mutations in polymorphic inversions compared to collinear regions has previously been noted  
403 in multiple empirical studies. By crossing within and between populations Butlin and Day showed that a  
404 significant proportion of the observed heterokaryotype advantage in seaweed flies (*Coelopa frigida*),  
405 could be ascribed to associative overdominance caused by deleterious recessive mutations [18]. A similar  
406 result was found in *D. pseudoobscura* where crosses between populations yielded fitter homokaryotypes  
407 than crosses within populations [52]. Likewise, in *Drosophila melanogaster*, inversion-carrying  
408 chromosomes were more likely to carry lethals than inversion-free chromosomes [20]. Even when  
409 excluding lethal mutations homokaryotypes still had significantly lower fitness than heterokaryotypes  
410 indicating overdominant mutations [20, 22]. Another study in *D. melanogaster* found that minority  
411 arrangements in wild populations contained significantly more p-elements [8]. A follow-up study also  
412 found increased numbers of transposable elements (TEs) in low frequency inversions [21]. Here, the  
413 authors argued that the rate of back mutation (i.e. removal of TEs) was too high to allow for continued  
414 accumulation as predicted under Muller's ratchet. Other studies have shown that the efficacy of selection  
415 is reduced in inversions. In the laboratory, lethal alleles located within inversions in *Drosophila*  
416 *melanogaster* were maintained at similar frequencies for over 100 generations indicating that selection  
417 was not effective [19]. Next generation sequencing has allowed more detailed surveys of inversion  
418 content. A recent study by Jay *et al.* [23] examined the content of the P supergene in *Heliconius numata*  
419 which encompasses two chromosomal inversions. They found an enrichment of non-synonymous relative  
420 to synonymous substitutions, negative selection on the arrangements, and a larger proportion of  
421 transposable elements compared to the rest of the genome [23]. Overall, these results indicate that  
422 mutation accumulation may be a common process in natural inversions, where the types of mutations that  
423 are accumulated can vary.

424  
425 The rate of mutation accumulation differs between the standard and inverted arrangements. The extent of  
426 this difference depends on the relative frequency of the two homokaryotypes, as most "genome shuffling"  
427 occurs within homokaryotypes. Mutation accumulation is magnified in the minority arrangement as the  
428 associated subpopulation experiences a stronger reduction in population size and therefore a lower  
429 effective recombination rate (approx.  $rp^2$ , with  $r$  - the recombination rate and  $p$  - the frequency of the  
430 minority arrangement). Moreover, the purging of recessive deleterious mutations is less effective in the  
431 minority arrangement as the respective mutations are only exposed to selection in few individuals. Eanes  
432 *et al.* developed a model showing that the minority arrangement accumulated more p-elements at lower

433 frequencies and predictions from this model matched empirical data from *D. melanogaster* [8]. Other  
434 empirical studies have also illustrated the relationship between arrangement frequency and mutational  
435 load [53-55]. Most notably, Tuttle *et al.* examined the 2<sup>m</sup> allele (an arrangement of an inverted region on  
436 chromosome 2) in white-throated sparrow (*Zonotrichia albicollis*), which exists almost exclusively in the  
437 heterokaryotypic state [56]. They found that 2<sup>m</sup> contained an excess of non-synonymous fixed mutations,  
438 which is consistent with functional degradation. Here, by revealing the feedback loop between  
439 arrangement frequency and mutational load, we present an intuitive reasoning for these observations.

440  
441 The accumulation of recessive deleterious mutations in the arrangements led to heterokaryotype  
442 advantage caused by the masking of recessive mutations. In the theoretical literature, there is a large body  
443 of work focusing on the role of recessive deleterious mutations with regard to the invasion of a new  
444 inversion [24-26]. This body of work has concentrated on the role of existing standing genetic variation.  
445 In contrast, we do not know of theoretical work that has addressed the role of *de novo* deleterious  
446 mutations in the long-term maintenance of an inversion polymorphism. In nature, a contribution of  
447 deleterious recessive alleles to heterokaryotype advantage has been inferred in seaweed flies [18], but it is  
448 unknown whether these mutations predate the inversion itself. Furthermore, similar empirical tests in  
449 other taxa remain scarce. As heterokaryotypes are often observed to be fitter than homokaryotypes [57-  
450 59], mutation accumulation may commonly play a role in the maintenance of inversion polymorphisms.

451  
452 In the age of next generation sequencing, the genomic landscape of many inversions is being dissected to  
453 elucidate the processes driving inversion evolution [7, 60]. Our work adds to past theoretical results  
454 showing that regions of low recombination may accumulate neutral divergence (ex: Navarro et al [10]).  
455 Since various natural inversions have been reported to influence adaptive traits, divergence observed  
456 between arrangements has often been assumed to be adaptive and/or to predate the inversion itself,  
457 whereas the process of deleterious mutation accumulation has received little attention [7, 13]. However,  
458 not only adaptation and but also simply drift are able to generate this pattern of diversity in inversions  
459 [17]. We partly recover this result: we show, in Figure 3, that it is possible for fixed mutations between  
460 different arrangements to be neither adaptive nor predating the inversion. The strong divergence between  
461 arrangements that results from deleterious mutation accumulation can produce a similar population  
462 genetic signature to that of a cluster of (co-)adapted alleles within an arrangement [61-63].

463  
464 We were specifically interested in the long-term evolutionary fate of the inversion, when both  
465 arrangements were maintained in the population. We identified multiple stable evolutionary outcomes for  
466 each arrangement under deleterious recessive mutation accumulation (over 60N generations). They can be

467 divided into three general categories, depending on the mutational load of the arrangement and the fitness  
468 of its corresponding homokaryotype.

469  
470 First, if the mutation accumulation and the associated gradual decrease in homokaryotype fitness  
471 continued, then the corresponding homokaryotype eventually became inviable. This often occurred in  
472 only the minority arrangement. In this case the polymorphism was maintained but the minority  
473 arrangement only appeared in heterokaryotypes. When the corresponding homokaryotypes of both  
474 arrangements became inviable, only heterokaryotypes contributed to subsequent generations. Thus, the  
475 mutation accumulation process shown here is a credible model for the evolution of a balanced lethal  
476 system. Our results show that low population size and reduced gene flux favor the evolution of balanced  
477 lethality. Several empirical examples of balanced lethal systems associated with structural variants exist.  
478 These include multiple overlapping structural variants in crested newts [46], inversions in *Drosophila*  
479 *tropicalis* [43], and translocations (similar to inversions, effective recombination in the translocated  
480 regions is also reduced) in multiple genera of plants such as *Isotoma* [44], *Rhoeo* [45], *Gayophytum* [47]  
481 and *Oenothera* [42]. Using a mathematical model inspired by the latter system, de Waal Malejit and  
482 Charlesworth proposed that the accumulation of deleterious recessive mutations could create sufficient  
483 mutational load for the maintenance of translocation heterozygosity in a selfing population, assuming a  
484 large enough mutational target [64]. To provide evidence for the evolution of balanced lethal systems  
485 through mutation accumulation in structural variants, inference of the demographic history of these  
486 populations will be essential in the future.

487  
488 The second long-term outcome is the maintenance of a highly fit homokaryotype with low mutational  
489 load of the corresponding arrangement. This outcome was only observed in the majority arrangement and  
490 at high GC rates. Here the mutation accumulation is truly stopped as opposed to the case of haplotype  
491 structuring, where the consequences of mutation accumulation are bypassed. While the majority  
492 homokaryotype maintains a stable, high fitness, the fitness of the minority homokaryotypes drops to 0.  
493 When this occurs, the minority arrangement remains at very low frequency ( $s_{\text{HET}} / (1 + 2s_{\text{HET}})$  if the fitness  
494 advantage of the heterokaryotype over the majority homokaryotype is only due to the imposed initial  
495 heterozygote advantage). Thus, this outcome is the least stable as the high frequency of the majority  
496 arrangement combined with a small fitness difference between heterokaryotypes and majority  
497 homokaryotypes facilitates fixation of the majority arrangement.

498  
499 The third category of long-term stable outcomes involves haplotype structuring in one or both of the  
500 arrangements. Haplotype structuring halts the fitness decay of the corresponding homokaryotype but it

501 does not stop the mutation accumulation process. As illustrated in Figure 5, the existence of two (or more)  
502 divergent haplotype clusters within an arrangement implies that most mutations will be masked in  
503 homokaryotype heterozygotes (e.g.  $I_jI_k$  or  $S_jS_k$ ). Similarly to what happens between arrangements,  
504 mutations tend to be private to haplotype clusters. Therefore, a subset of homokaryotypes still contributes  
505 to the next generation. The fitness consequences of mutation accumulation are merely bypassed due to the  
506 recessivity of the deleterious mutations. It is critical to note that haplotype structuring as described here is  
507 a within-population mechanism as both drift and selection are required. Whereas the same outcome  
508 (divergent haplotypes) may be obtained in separate populations [65], drift should be sufficient to explain  
509 this pattern. Thus, haplotype structuring is not expected to evolve in highly structured populations with  
510 little migration between them.

511  
512 Wasserman showed that if the fitnesses of both homokaryotypes are reduced due to the existence of a  
513 recombinational load, a heterokaryotype fitness advantage will appear [12]. The recombinational load in  
514 the Wasserman model is caused by the existence of multiple divergent haplotypes containing a balanced  
515 combination of epistatically interacting alleles. Here, we show that accumulation of deleterious recessive  
516 mutations can generate a similar pattern. However, with dominance, this effect is due to a combination of  
517 segregational and recombinational load. Thus, recombinational load can be generated without epistasis. In  
518 both models, the key element for reduction in homokaryotype fitness is the existence of interactions at the  
519 gene level (either intra- or inter-locus) that lead to the formation of a recombinational or/and  
520 segregational load for the homokaryotypes.

521  
522 Haplotype structuring occurs when a continual input of deleterious mutations results in associative  
523 overdominance in regions of low recombination, where it increases genetic diversity by maintaining  
524 complementary heterozygous haplotypes. Thus, the occurrence of haplotype structuring is not unique to  
525 inversions. It can also occur in diploid low-recombination systems with segregation of chromosomes. We  
526 were able to reproduce haplotype structuring using simulations with similar conditions but without  
527 assuming an inversion, provided there was a strong decrease in crossing-over rate (Figure S11). Using a  
528 theoretical model, Gilbert *et al.* recently showed that haplotype structuring can occur in regions of low  
529 recombination under quite general conditions, especially if deleterious selection coefficients are of  
530 intermediate strength [66]. Importantly, they demonstrated that the pattern of increased diversity caused  
531 by associative overdominance (likely a result of haplotype structuring) is also sustained with incomplete  
532 dominance. Moreover, the predicted pattern of increased diversity was observed in human genomic data  
533 [66].

534

535 Haplotype structuring has been described previously [48], where the authors modeled the accumulation of  
536 deleterious recessive mutations in a diploid, non-recombining, random-mating, sexual population and  
537 noted that the population could become crystallized into two divergent haplotypes. Although we  
538 recovered the crystallization part of the process, we sometimes observed more than two haplotype clusters  
539 (Figure S12). In this case, fitness could be multimodal (Figure S12b) depending on the fitnesses of the  
540 different homokaryotype heterozygotes. A larger number of divergent haplotypes increases the average  
541 fitness of homokaryotypic individuals because homozygotes (e.g.:  $I_i I_j S_j S_j$ ) are inviable and their  
542 proportion (given by:  $\sum_{j=1}^n p_j^2$ , i.e. the sum of all possible homokaryotype homozygotes) decreases as the  
543 number of haplotype clusters increases. Therefore, the number of haplotype clusters obtained is the result  
544 of a balance between genic selection, which selects for many haplotype clusters, and genetic drift, which  
545 reduces the number of haplotype clusters. Once clusters are formed, new recombinant haplotypes are  
546 counterselected due to the high number of shared recessive deleterious mutations between a recombinant  
547 and a resident haplotype (Figure 5).

548

549 Whereas various examples of balanced lethals are known (discussed above), we are not aware of existing  
550 empirical evidence for haplotype structuring in inversions. This could be for two reasons. First,  
551 compensatory evolution and/or selective sweeps of beneficial mutations within the arrangements could  
552 erase haplotype structuring. We are currently not including beneficial mutations in our simulations;  
553 adding them to the model would lead to selective sweeps that should reduce the diversity within the  
554 (sub)population. Therefore the initial requirement of strongly divergent haplotypes would possibly not be  
555 met. Second, the pattern may have remained invisible to date due to the low density of markers available  
556 in the past as well as the current common practice of pooled sequencing, which does not reveal  
557 haplotypes. Additionally, other aspects of experimental design - for example breeding designs that allow  
558 the fitness of offspring of each mating pair to be measured - are necessary to detect the predicted bimodal  
559 fitness distribution. Future empirical work could investigate these patterns, testing explicitly for bimodal  
560 fitness distributions and for the existence of clusters of haplotypes within arrangements using individual  
561 re-sequencing data.

562

563 There are several limitations to our study. First, we focus on deleterious mutations. The inclusion of  
564 beneficial mutations will affect the invasion process and the probability of the inverted arrangement  
565 fixing: the effects of such mutations on an existing polymorphic inversion remain unclear. The spread of a  
566 beneficial allele within an arrangement will cause a loss of genetic diversity and the corresponding  
567 increase in mutational load could cancel out the initial selective advantage provided by the beneficial

568 mutation. We hope to investigate this in future work. Second, we considered all deleterious mutations to  
569 be fully recessive. Incomplete dominance may slow the accumulation of deleterious mutations but is  
570 unlikely to stop it. Preliminary work shows that as long as recombination is low enough and selection  
571 maintains the structural variant polymorphism, even fully dominant deleterious mutations will accumulate  
572 (Gutiérrez-Valencia, pers. comm.). Third, we only consider gene conversion as a mechanism for gene  
573 flux between arrangements and not double crossovers. Double crossovers transfer larger tracts of  
574 sequence and thus their inclusion will increase gene flux. This would have similar consequences to  
575 increasing the GC rate (see Figure S6) and would likely decrease the rate of mutation accumulation and  
576 all potential ensuing processes (e.g. haplotype structuring). However, evidence suggests that double  
577 crossover rates within inversion heterokaryotypes are reduced compared to rates in homokaryotypes or  
578 collinear regions [67-69]. Furthermore, the contribution of double crossovers to gene flux is negligible as  
579 long as the size of the inversion is small compared to the inverse of the rate of double strand breaks [70].  
580 Finally, computational limitations prevented us from exploring a wide range of population sizes and  
581 inversion sizes. While we do not expect these parameters to alter our qualitative conclusions, it is difficult  
582 to predict their quantitative effects.

583 Our results show that inversions are dynamic variants whose allelic content can evolve and impact their  
584 evolutionary fate. We also show that non-adaptive processes in inversions can generate “adaptive-like”  
585 signatures. These results stress that the evolution of the allelic content of the inversion should be included  
586 in future models and in interpretations of sequence variation in inversions. Our study suggests several  
587 particular evolutionary outcomes of inversion evolution, which are potentially also applicable to regions  
588 of low recombination. The advent of improved methods for genome assembly should make it possible to  
589 determine how often haplotype structuring and balanced lethals occur in nature.

590

## 591 **Materials and Methods**

592 Simulations were implemented in Slim v2.6 [28] (scripts, analysis scripts, and seeds available at  
593 <https://gitlab.com/evoldyn/inversion/wikis/home>)

594

## 595 **Acknowledgements**

596 We thank the Bank lab for support and helpful comments on the study design and the manuscript. We  
597 thank the editor and the reviewers for constructive comments on earlier versions of this manuscript. We  
598 thank I. Fragata for advice on study design and figures, I. Gordo for valuable advice, and B.  
599 Charlesworth, A. Westram and K. Johannesson for helpful comments on the manuscript. E. B. was  
600 supported by a Marie Skłodowska-Curie fellowship 704920 – ADAPTIVE INVERSIONS. R.K.B. was

601 supported by the NERC and by ERC Advanced Grant 693030 - BARRIERS. C.B. is grateful for support  
602 by EMBO Installation Grant IG4152. A.B. and C.B. were supported by ERC Starting Grant 804569 -  
603 FIT2GO.

604

### 605 **Author Contributions**

606 E.B. and R.K.B. conceived of the study. E.B. and A.B. designed the simulations. A.B. wrote the analysis  
607 scripts. A.B. and E.B. analyzed the data. C.B supervised the project. All authors interpreted the results  
608 and wrote the paper.

609

### 610 **Competing interests**

611 The authors declare they have no competing interests.

612

### 613 **Materials & Correspondence**

614 Requests for material and correspondence can be addressed to E.B ([emma.berdan@gmail.com](mailto:emma.berdan@gmail.com)) and A.B.  
615 ([blancaert.a@gmail.com](mailto:blancaert.a@gmail.com))



## References

1. Dobigny G, Britton-Davidian J, Robinson TJ. Chromosomal polymorphism in mammals: An evolutionary perspective. *Biol Rev.* 2015;92(1):1-21. doi: 10.1111/brv.12213. PubMed PMID: WOS:000391937700001.
2. Feuk L, MacDonald JR, Tang T, Carson AR, Li M, Rao G, et al. Discovery of human inversion polymorphisms by comparative analysis of human and chimpanzee DNA sequence assemblies. *Plos Genet.* 2005;1(4):489-98. doi: 10.1371/journal.pgen.0010056. PubMed PMID: WOS:000234714800009.
3. Kirkpatrick M. How and why chromosome inversions evolve. *PLoS Biology.* 2010;8(9). doi: 10.1371/journal.pbio.1000501. PubMed PMID: 20927412; PubMed Central PMCID: PMCPMC2946949.
4. Ayala D, Guerrero RF, Kirkpatrick M. Reproductive isolation and local adaptation quantified for a chromosome inversion in a malaria mosquito. *Evolution.* 2013;67(4):946-58.
5. Lowry DB, Willis JH. A widespread chromosomal inversion polymorphism contributes to a major life-history transition, local adaptation, and reproductive isolation. *Plos Biology.* 2010;8(9). doi: 10.1371/journal.pbio.1000500. PubMed PMID: WOS:000282279200019.
6. Twyford AD, Friedman J. Adaptive divergence in the monkey flower *Mimulus guttatus* is maintained by a chromosomal inversion. *Evolution.* 2015;69(6):1476-86.
7. Wellenreuther M, Bernatchez L. Eco-evolutionary genomics of chromosomal inversions. *Trends Ecol Evol.* 2018;33(6):427-40. doi: 10.1016/j.tree.2018.04.002. PubMed PMID: WOS:000432462300007.
8. Eanes WF, Wesley C, Charlesworth B. Accumulation of P-Elements in minority inversions in natural populations of *Drosophila melanogaster*. *Genet Res.* 1992;59(1):1-9. doi: Doi 10.1017/S0016672300030111. PubMed PMID: WOS:A1992HK67900001.
9. Faria R, Johannesson K, Butlin RK, Westram AM. Evolving Inversions. *Trends Ecol Evol.* 2019;34(3):239-48. doi: 10.1016/j.tree.2018.12.005. PubMed PMID: 30691998.
10. Navarro A, Bardadilla A, Ruiz A. Effect of inversion polymorphism on the neutral nucleotide variability of linked chromosomal regions in *Drosophila*. *Genetics.* 2000;155(2):685-98. PubMed PMID: WOS:000087475100018.
11. Santos J, Pascual M, Fragata I, Simoes P, Santos MA, Lima M, et al. Tracking changes in chromosomal arrangements and their genetic content during adaptation. *Journal of Evolutionary Biology.* 2016;29(6):1151-67. doi: 10.1111/jeb.12856. PubMed PMID: 26969850.
12. Wasserman M. Recombination-induced chromosomal heterosis. *Genetics.* 1968;58(1):125-39.

13. Fuller ZL, Koury SA, Phadnis N, Schaeffer SW. How chromosomal rearrangements shape adaptation and speciation: Case studies in *Drosophila pseudoobscura* and its sibling species *Drosophila persimilis*. *Molecular ecology*. 2018. doi: 10.1111/mec.14923. PubMed PMID: 30402909.
14. Navarro A, Betran E, Barbadilla A, Ruiz A. Recombination and gene flux caused by gene conversion and crossing over in inversion heterokaryotypes. *Genetics*. 1997;146(2):695-709. PubMed PMID: WOS:A1997XD21600023.
15. Crown KN, Miller DE, Sekelsky J, Hawley RS. Local inversion heterozygosity alters recombination throughout the genome. *Current Biology*. 2018;28(18):2984-90 e3. doi: 10.1016/j.cub.2018.07.004. PubMed PMID: 30174188; PubMed Central PMCID: PMC6156927.
16. Korunes KL, Noor MA. Pervasive gene conversion in chromosomal inversion heterozygotes. *Molecular ecology*. 2019;28(6):1302-15.
17. Guerrero RF, Rousset F, Kirkpatrick M. Coalescent patterns for chromosomal inversions in divergent populations. *Philos T R Soc B*. 2012;367(1587):430-8. doi: 10.1098/rstb.2011.0246. PubMed PMID: WOS:000298659600010.
18. Butlin RK, Day TH. Genic and karyotypic selection on an inversion polymorphism in the seaweed fly, *Coelopa frigida*. *Heredity*. 1985;54:267-74. doi: DOI 10.1038/hdy.1985.36. PubMed PMID: WOS:A1985AKL1200018.
19. Albornoz J, Dominguez A. Inversion polymorphism and accumulation of lethals in selected lines of *Drosophila melanogaster*. *Heredity*. 1994;73:92-7. doi: DOI 10.1038/hdy.1994.103. PubMed PMID: WOS:A1994NU77100012.
20. Mukai T, Yamaguchi O. The genetic structure of natural populations of *Drosophila melanogaster*. XI. Genetic variability in a local population. *Genetics*. 1974;76(2):339-66.
21. Sniegowski PD, Charlesworth B. Transposable element numbers in cosmopolitan inversions from a natural population of *Drosophila melanogaster*. *Genetics*. 1994;137(3):815-27.
22. Mukai T, Chigusa S, Yoshikawa I. The genetic structure of natural populations of *Drosophila melanogaster*. II. Overdominance of spontaneous mutant polygenes controlling viability in homozygous genetic background. *Genetics*. 1964;50(4):711.
23. Jay P, Chouteau M, Whibley A, Bastide H, Llaurens V, Parrinello H, et al. Mutation accumulation in chromosomal inversions maintains wing pattern polymorphism in a butterfly. *bioRxiv*. 2019:736504. doi: 10.1101/736504.
24. Nei M, Kojima KI, Schaffer HE. Frequency changes of new inversions in populations under mutation-selection equilibria. *Genetics*. 1967;57(4):741-50. PubMed PMID: WOS:A1967A342100001.
25. Ohta T. Associative overdominance caused by linked detrimental mutations. *Genetics Research*. 1971;18(3):277-86.

26. Santos M. The role of genic selection in the establishment of inversion polymorphism in *Drosophila subobscura*. *Genetica*. 1986;69(1):35-45.
27. Kirkpatrick M, Barton N. Chromosome inversions, local adaptation and speciation. *Genetics*. 2006;173(1):419-34.
28. Haller BC, Messer PW. SLiM 2: Flexible, interactive forward genetic simulations. *Molecular biology and evolution*. 2016;34(1):230-40.
29. Betancourt AJ, Presgraves DC. Linkage limits the power of natural selection in *Drosophila*. *Proceedings of the National Academy of Sciences*. 2002;99(21):13616-20. doi: 10.1073/pnas.212277199. PubMed PMID: 12370444; PubMed Central PMCID: PMC129723.
30. Marais G. Biased gene conversion: Implications for genome and sex evolution. *Trends in Genetics*. 2003;19(6):330-8. doi: 10.1016/S0168-9525(03)00116-1. PubMed PMID: 12801726.
31. Miller DE, Takeo S, Nandan K, Paulson A, Gogol MM, Noll AC, et al. A whole-chromosome analysis of meiotic recombination in *Drosophila melanogaster*. *G3*. 2012;2(2):249-60. doi: 10.1534/g3.111.001396. PubMed PMID: 22384403; PubMed Central PMCID: PMC3284332.
32. Haag-Liautard C, Dorris M, Maside X, Macaskill S, Halligan DL, Charlesworth B, et al. Direct estimation of per nucleotide and genomic deleterious mutation rates in *Drosophila*. *Nature*. 2007;445(7123):82.
33. Charlesworth D, Morgan M, Charlesworth B. Mutation accumulation in finite outbreeding and inbreeding populations. *Genet Res*. 1993;61(1):39-56.
34. Uricchio LH, Hernandez RD. Robust forward simulations of recurrent hitchhiking. *Genetics*. 2014;197(1):221-36.
35. Felsenstein J. The evolutionary advantage of recombination. *Genetics*. 1974;78(2):737-56.
36. Kliman RM, Hey J. Reduced natural selection associated with low recombination in *Drosophila melanogaster*. *Molecular biology and evolution*. 1993;10(6):1239-58.
37. Moran NA. Accelerated evolution and Muller's ratchet in endosymbiotic bacteria. *Proceedings of the National Academy of Sciences*. 1996;93(7):2873-8.
38. Muller HJ. The relation of recombination to mutational advance. *Mutation Research/Fundamental and Molecular Mechanisms of Mutagenesis*. 1964;1(1):2-9.
39. Dolgin ES, Charlesworth B. The effects of recombination rate on the distribution and abundance of transposable elements. *Genetics*. 2008;178(4):2169-77.
40. Lynch M, Conery J, Bürger R. Mutational meltdowns in sexual populations. *Evolution*. 1995;49(6):1067-80.
41. Wasserman M. Factors influencing fitness in chromosomal strains in *Drosophila subobscura*. *Genetics*. 1972;72(4):691-708.

42. Cleland RE. *Oenothera*; cytogenetics and evolution: Academic Press; 1972.
43. Dobzhansky T, Pavlovsky O. An extreme case of heterosis in a Central American population of *Drosophila tropicalis*. Proceedings of the National Academy of Sciences. 1955;41(5):289.
44. James S. Complex hybridity in *Isotoma petraea*. Heredity. 1965;20(3):341.
45. Lin YJ. Chromosome distribution and catenation in *Rhoeo spathacea* var. concolor. Chromosoma. 1979;71(1):109-27.
46. Macgregor HC, Horner H. Heteromorphism for chromosome-1 - Requirement for normal development in Crested Newts. Chromosoma. 1980;76(2):111-22. doi: Doi 10.1007/Bf00293412. PubMed PMID: WOS:A1980JC67100001.
47. Thien LB. Chromosome translocations in *Gayophytum* (Onagraceae). Evolution. 1969;23(3):456-65.
48. Charlesworth B, Charlesworth D. Rapid fixation of deleterious alleles can be caused by Muller's ratchet. Genetical Research. 1997;70(1):63-73. doi: Doi 10.1017/S0016672397002899. PubMed PMID: WOS:A1997YF21000007.
49. Betancourt AJ, Welch JJ, Charlesworth B. Reduced effectiveness of selection caused by a lack of recombination. Current Biology. 2009;19(8):655-60.
50. Campos JL, Halligan DL, Haddrill PR, Charlesworth B. The relation between recombination rate and patterns of molecular evolution and variation in *Drosophila melanogaster*. Molecular biology and evolution. 2014;31(4):1010-28.
51. Charlesworth B. Background selection and patterns of genetic diversity in *Drosophila melanogaster*. Genetics Research. 1996;68(2):131-49.
52. Sewall Wright T, Dobzhansky WH. Genetics of natural populations. VII. The allelism of lethals in the third chromosome of *Drosophila pseudoobscura*. Genetics. 1942;27(4):363.
53. Crumpacker DW, Salceda VM. Chromosomal polymorphism and genetic load in *Drosophila pseudoobscura*. Genetics. 1969;61(4):859.
54. Dobzhansky T, Spassky B, Tidwell T. Genetics of natural populations. XXXII. Inbreeding and the mutational and balanced genetic loads in natural populations of *Drosophila pseudoobscura*. Genetics. 1963;48(3):361.
55. Yang YY, Lin FJ, Chang HY. Comparison of recessive lethal accumulation in inversion-bearing and inversion-free chromosomes in *Drosophila*. Zool Stud. 2002;41(3):271-82. PubMed PMID: WOS:000177441300006.
56. Tuttle EM, Bergland AO, Korody ML, Brewer MS, Newhouse DJ, Minx P, et al. Divergence and functional degradation of a sex chromosome-like supergene. Current Biology. 2016;26(3):344-50.

57. Kim K-W, Bennison C, Hemmings N, Brookes L, Hurley LL, Griffith SC, et al. A sex-linked supergene controls sperm morphology and swimming speed in a songbird. *Nature ecology & evolution*. 2017;1(8):1168.
58. Lindtke D, Lucek K, Soria-Carrasco V, Villoutreix R, Farkas TE, Riesch R, et al. Long-term balancing selection on chromosomal variants associated with crypsis in a stick insect. *Molecular ecology*. 2017;26(22):6189-205.
59. Schaeffer SW. Selection in heterogeneous environments maintains the gene arrangement polymorphism of *Drosophila pseudoobscura*. *Evolution*. 2008;62(12):3082-99.
60. Wellenreuther M, Merot C, Berdan E, Bernatchez L. Going beyond SNPs: the role of structural genomic variants in adaptive evolution and species diversification. *Molecular ecology*. 2019. doi: 10.1111/mec.15066. PubMed PMID: 30834648.
61. Nosil P, Funk DJ, Ortiz-Barrientos D. Divergent selection and heterogeneous genomic divergence. *Molecular ecology*. 2009;18(3):375-402.
62. Strasburg JL, Sherman NA, Wright KM, Moyle LC, Willis JH, Rieseberg LH. What can patterns of differentiation across plant genomes tell us about adaptation and speciation? *Philosophical Transactions of the Royal Society B-Biological Sciences*. 2012;367(1587):364-73. doi: 10.1098/rstb.2011.0199. PubMed PMID: 22201166; PubMed Central PMCID: PMC3233712.
63. Yeaman S, Whitlock MC. The genetic architecture of adaptation under migration-selection balance. *Evolution*. 2011;65(7):1897-911. doi: 10.1111/j.1558-5646.2011.01269.x. PubMed PMID: 21729046.
64. de Waal Malefijt M, Charlesworth B. A model for the evolution of translocation heterozygosity. *Heredity*. 1979;43(3):315.
65. Dobzhansky T. Genetics of natural populations. XVIII. Experiments on chromosomes of *Drosophila pseudoobscura* from different geographic regions. *Genetics*. 1948;33(6):588.
66. Gilbert KJ, Pouyet F, Excoffier L, Peischl S. Transition from background selection to associative overdominance promotes diversity in regions of low recombination. *Curr Biol*. 2019.
67. Manzano-Winkler B. Suppressed double crossovers in *D. pseudoobscura* inversion heterozygotes. *Drosophila Information Service*. 2015;98:57-9.
68. Stevison LS, Hoehn KB, Noor MA. Effects of inversions on within-and between-species recombination and divergence. *Genome Biol Evol*. 2011;3:830-41.
69. Stump A, Pombi M, Goeddel L, Ribeiro J, Wilder JA, Torre A, et al. Genetic exchange in 2La inversion heterokaryotypes of *Anopheles gambiae*. *Insect molecular biology*. 2007;16(6):703-9.
70. Berdan EL, Blanckaert A, Slotte T, Suh A, Westram AM, Fragata I. Unboxing mutations: Connecting mutation types with evolutionary consequences. arXiv preprint arXiv:200913830. 2020.

## Figure Legends

### Figure 1

Gene conversion increases the probability that an inversion is fixed or lost. (A) Probability of the inversion being polymorphic at generation 10,000 as a function of the mutational load in the presence (filled) and absence of GC (empty). (B) Probability of the inversion remaining polymorphic at generation 500,000 as a function of the mutational load in the presence (filled) and absence of GC (empty). (C) Distribution of the time of loss of the inversion in the presence of GC. Simulations where the inversion remained polymorphic (cyan) or fixed (orange) are indicated specifically. (D) Distribution of the time of loss of the inversion in the absence of GC. Simulations where the inversion remained polymorphic (cyan) or fixed (orange) are indicated specifically. (E) Probability of fixation of the inversion as a function of the mutational load in the presence (filled) and absence of GC (empty).

### Figure 2

Fitness decay of the homokaryotypes and accumulation of mutations in the different arrangements (A,C,E). Fitness of the different karyotypes for the inversion and frequency (green) of the inversion over 500,000 generations (starting at generation 200 after introduction) following the introduction of the inversion under (A) a scenario with no gene conversion, (C) a scenario with 1/10 of the *D. melanogaster* gene conversion rate, and (E) a scenario with the *D. melanogaster* gene conversion rate. (B,D,F) Corresponding cumulative distribution of fixed mutations per kb in the inverted arrangement (red), the standard arrangement (blue), the inverted region (turquoise), and in the collinear region (black) depending on the generation when the mutation appears. Results were obtained from 1,000 replicates where we only display successful maintenance of the inversion polymorphism (5 cases with a high rate of GC, 60 cases with 1/10 of the previously used GC rate GC, and 61 cases without GC).

### Figure 3

Divergence between karyotypes in the collinear, inverted, and linked regions. Linked regions are on the same chromosome as the inverted region but not within it. Each dot represents a single SNP and boxplots are overlain in pink. (A).  $F_{ST}$  without gene conversion, (B).  $F_{ST}$  with gene conversion.

### Figure 4

Different evolutionary outcomes (A-D) and allelic content of the arrangements (E-H).

(A-D) represent the fitness of the different karyotypes as well as the frequency of the inversion for all 4 outcomes. Fitness of the standard homokaryotype is given by the dotted blue line, of the inverted homokaryotype by the red dashed line and of the heterokaryotype by the dash-dotted purple line. The frequency of the inversion is given by the solid green line. A) Balanced lethals, B) inverted homokaryotypic is inviable, standard homokaryotype remains viable through haplotype structuring: C) inverted homokaryotype is viable, standard homokaryotype is inviable until the inversion fixes, D) haplotype structuring in both the inverted and standard arrangements. (E-H) Allelic content of the inversion, each horizontal line represents a haplotype in the population and each vertical line represents a genomic locus. Yellow denotes that an individual possesses the derived allele and blue the ancestral one. The black circle indicates where the haplotypes were taken from. E) Mutation accumulation in the minor

arrangement, F) haplotype structuring in the standard arrangement, G) purifying selection in the majority arrangement, H) haplotype structuring in the inverted arrangement.

## Figure 5

Schematic representation of the consequences of haplotype structuring on the fitness distribution of the homokaryotypes. Red, cyan, and mustard represent deleterious mutations. Homokaryotypic homozygotes have a fitness near 0 while homokaryotypic heterozygotes have a positive fitness, as only the mutations that are fixed in the arrangements (in red) are expressed, while the mutations unique to each haplotype (in mustard and cyan) are masked. This leads to the bimodal distribution of fitness illustrated here. For reference the vertical lines correspond to the mean fitness of heterokaryotypes (dashed purple) and homokaryotypes (black line). Haplotype structuring is stable against recombination as the new recombinant will express both mustard and cyan mutations, leading to a lower fitness, whenever it is associated with either of the two major haplotypes.

## Supplemental Figure Legends

### Figure S1.

Density distribution of the initial mutational load. A) the mutational load in the whole population at the end of the burn-in. B) the mutational load of the inverted arrangement in the haplotypes we selected (200 random plus the 4 best and the 4 worst and one close to the median). C) the mutational load of the inverted arrangement after correcting for the number of simulations done per haplotype. This figure illustrates that we do not always have the same number of simulations for each datapoint in Figure 1.

### Figure S2.

Distribution of the initial relative fitnesses of all 3 karyotypes when an inversion occurs in any haplotype in a population.

### Figure S3.

Effects of the added heterokaryotype advantage. (A) Distribution of the time of loss of the inversion at  $s_{\text{HET}}=0$ . The number of simulations that remained polymorphic (cyan) or fixed (yellow) are indicated specifically to the right of the dashed line. (B) Distribution of the time of loss of the inversion at  $s_{\text{HET}}=0.0003$ . The number of simulations that remained polymorphic (cyan) or fixed (yellow) are indicated specifically to the right of the dashed line. (C) Distribution of the time of loss of the inversion at  $s_{\text{HET}}=0.003$ . The number of simulations that remained polymorphic (cyan) or fixed (yellow) are indicated specifically to the right of the dashed line. (D) Distribution of the time of loss of the inversion at  $s_{\text{HET}}=0.006$ . Simulations that remained polymorphic (cyan) or fixed (yellow) are indicated specifically to the right of the dashed line. (E) Mutation accumulation in the major arrangement under  $s_{\text{HET}}=0$  (red),  $s_{\text{HET}}=0.0003$  (green),  $s_{\text{HET}}=0.003$  (cyan), and  $s_{\text{HET}}=0.006$  (purple). Each dot represents a single run that ended at generation 500,000. (F) Mutation accumulation in the major arrangement under  $s_{\text{HET}}=0$  (red),  $s_{\text{HET}}=0.0003$  (green),  $s_{\text{HET}}=0.003$  (cyan), and  $s_{\text{HET}}=0.006$  (purple). Each dot represents a single run that ended at generation 500,000.

### Figure S4.

Distribution of the time of loss of the inversion at different population sizes. For A and B  $N=25,000$  and for C and D  $N=5,000$ . A and C show simulations run without gene conversion and C and D show simulations with gene conversion added. All plots show distribution of the time of loss of the inversion. Simulations that remained polymorphic (cyan) or fixed (yellow) are indicated specifically to the right of the dashed line.

### Figure S5.

Mutation accumulation (A,B) and Mutational load (C,D) for the major (A,C) and minor (B,D) arrangements for different sized inversions. Color indicates presence (red) or absence (blue) of gene conversion. Each dot represents a single run.

### Figure S6.

Gene Conversion exponentially affects mutation accumulation and mutational load of the arrangements. (A) Boxplot showing the number of deleterious mutations accumulated in the major arrangement after 500,000 generations. Overlain points represent single runs where haplotype structuring did not occur (red) or did occur (blue). (B) Boxplot showing the number of deleterious mutations accumulated in the minor arrangement after 500,000 generations. Overlain points represent single runs where haplotype structuring did not occur (red) or did occur (blue). (C) Boxplot showing the mutational load of the major arrangement after 500,000 generations. Overlain points represent single runs where haplotype structuring did not occur (red) or did occur (blue). (D) Boxplot showing the log fitness the minor arrangement after 500,000 generations. Overlain points represent single runs where haplotype structuring did not occur (red) or did occur (blue). Five points, which were zero due to  $R$ 's internal cutoff, were replaced by  $1 \times 10^{-7}$ .

### Figure S7.

Distribution of proportion of effectively neutral alleles among fixed mutations with (B,D) and without (A,C) gene conversion. Orange corresponds to mutations fixed in minor arrangement, cyan to mutations fixed in the major arrangement, pink to the average of mutations fixed in either the major or minor arrangement (i.e. alleles with an  $F_{ST}$  of 1), green to mutations that have fixed in the inverted region (i.e. fixed in both arrangements), and black to mutations that have fixed in the collinear region (chromosomes 2 and 3). The dashed black line indicate the proportion of new mutations that are effectively neutral, and the red dashed line corresponds to the proportion of effectively neutral mutations that fixed during the burn-in.

### Figure S8.

Density distribution of selective coefficient (log scale) of deleterious mutation with a  $F_{st}$  of 1 between the two arrangements. The red line indicates  $s=1/2N$ ; to the left mutation are effectively neutral. A) All deleterious mutations within the inverted region, B) all deleterious mutations private to and fixed in the minority arrangement and C) all deleterious mutations private to and fixed in the majority arrangement.



### **Figure S9.**

Fitness distributions as a function of time reveal bimodality of the fitness of the homokaryotype. The different panels correspond to the fitness distribution of A) the whole population, B) the inversion homokaryotype, C) the heterokaryotype and D) the standard homokaryotype. The color indicates how many individuals share a given fitness values (on a log scale).

### **Figure S10.**

Fitness distributions as a function of time reveals that haplotype structuring happens in the absence of the initial heterozygote advantage ( $s_{\text{HET}}=0$ ) in the major arrangement. The different panels correspond to the fitness distribution of A) the whole population, B) the inversion homokaryotype, C) the heterokaryotype and D) the standard homokaryotype. The color indicates how many individuals share a given fitness value (on a log scale).

### **Figure S11.**

Formation of haplotype structuring in a model without an inversion. We consider a chromosome without an inversion but sharing the same properties than our inversion model (see methods for details) and determine the combination of crossing over and gene conversion rate where we observe haplotype structuring in at least 1 of 10 replicates (in red; black indicates that haplotype structuring was not observed). The X and Y axis corresponds to the relative values of crossing over and gene conversion rate compared to the main simulations.

### **Figure S12.**

Haplotype structuring when more than two haplotype clusters emerge in an arrangement. Panels A to D display the fitness distributions of A) the whole population, B) the homokaryotype for the inverted arrangement, C) the heterokaryotype and D) the homokaryotype for the standard arrangement. Panels A to D are similar to Figure S8 but for a different simulation run. Panel E) and F) corresponds to the allelic content of the inverted (E) and standard arrangement (F) at generation 500,000. Each horizontal line represents a haplotype in the population and each vertical line represents a genomic position. Yellow denotes that an individual possesses the derived allele and blue the ancestral one.
